# An RNA Virome associated to the Golden Orb-weaver Spider *Nephila clavipes*

Humberto J. Debat<sup>1\*</sup>

<sup>1</sup>Instituto de Patología Vegetal - Centro de Investigaciones Agropecuarias, Instituto Nacional de Tecnología Agropecuaria (INTA), Argentina

*Submitted to Journal:*  
Frontiers in Microbiology

*Specialty Section:*  
Virology

*Article type:*  
Original Research Article

*Manuscript ID:*  
287947

*Received on:*  
15 Jun 2017

*Revised on:*  
12 Sep 2017

*Frontiers website link:*  
[www.frontiersin.org](http://www.frontiersin.org)

In review

---

### *Conflict of interest statement*

The authors declare that the research was conducted in the absence of any commercial or financial relationships that could be construed as a potential conflict of interest

### *Author contribution statement*

HJD designed the study, conducted all bioinformatics analysis, interpreted the data, wrote and approved the final manuscript.

### *Keywords*

RNA virus, virome, spider, *Nephila clavipes*, virus discovery

### *Abstract*

Word count: 279

The golden orb-weaver spider *Nephila clavipes*, known for its sexual size dimorphism, is abundant and widespread in the New World. The first annotated genome of orb-weaver spiders, exploring *N. clavipes*, has recently been reported. The study, focused primarily on the diversity of silk specific genes, shed light into the complex evolutionary history of spiders. Furthermore, a robust transcriptome analysis provided a massive resource for *N. clavipes* RNA survey. Here, I present evidence of viral sequences corresponding to the first 10 extant virus species associated to *N. clavipes* and indeed, nephilids. The putatively new species are linked to ssRNA positive-strand viruses, such as Picornavirales, and to ssRNA negative-strand and dsRNA viruses. In addition, I detected sequence data of new strains of two recently reported arthropod viruses, which complemented and extended the corresponding sequence references. The identified viruses appear to be complete, potentially functional, and presenting the typical architecture and consistent viral domains. The intrinsic nature of the detected sequences and their absence in the recently generated genome assembly, suggest that they correspond to bona fide RNA virus sequences. The available RNA data allowed for the first time to address a tissue/organ specific analysis of virus loads/presence in spiders, suggesting a complex spatial and differential distribution of the tentative viruses, encompassing the spider brain and also silk and venom glands. Until recently, the virus landscape associated to spiders remained elusive. The discovered viruses described here provide only a fragmented glimpse of the potential magnitude of the Aranea virosphere. Future studies should focus not only on complementing and expanding these findings, but also on addressing the potential ecological role of these viruses, which might influence the biology of these outstanding arthropod species.

### *Funding statement*

The author received no specific funding for this study.

### *Ethics statements*

(Authors are required to state the ethical considerations of their study in the manuscript, including for cases where the study was exempt from ethical approval procedures)

Does the study presented in the manuscript involve human or animal subjects: No

## An RNA Virome associated to the Golden Orb-weaver Spider *Nephila clavipes*

1 **Humberto J. Debat**<sup>1\*</sup>

2 <sup>1</sup>Instituto de Patología Vegetal, Centro de Investigaciones Agropecuarias, Instituto Nacional de  
3 Tecnología Agropecuaria (IPAVE-CIAP-INTA), X5020ICA, Córdoba, Argentina

4 \* **Correspondence:**

5 Corresponding Author: Humberto J. Debat [debat.humberto@inta.gob.ar](mailto:debat.humberto@inta.gob.ar)

6 **Keywords: RNA virus, Virome, Spider, Nephila clavipes, virus discovery.**

### 7 **Abstract**

8 The golden orb-weaver spider *Nephila clavipes*, known for its sexual size dimorphism, is abundant and  
9 widespread in the New World. The first annotated genome of orb-weaver spiders, exploring *N.*  
10 *clavipes*, has recently been reported. The study, focused primarily on the diversity of silk specific  
11 genes, shed light into the complex evolutionary history of spiders. Furthermore, a robust transcriptome  
12 analysis provided a massive resource for *N. clavipes* RNA survey. Here, I present evidence of viral  
13 sequences corresponding to the first 10 extant virus species associated to *N. clavipes* and indeed,  
14 nephilids. The putatively new species are linked to ssRNA positive-strand viruses, such as  
15 *Picornavirales*, and to ssRNA negative-strand and dsRNA viruses. In addition, I detected sequence  
16 data of new strains of two recently reported arthropod viruses, which complemented and extended the  
17 corresponding sequence references. The identified viruses appear to be complete, potentially  
18 functional, and presenting the typical architecture and consistent viral domains. The intrinsic nature of  
19 the detected sequences and their absence in the recently generated genome assembly, suggest that they  
20 correspond to *bona fide* RNA virus sequences. The available RNA data allowed for the first time to  
21 address a tissue/organ specific analysis of virus loads/presence in spiders, suggesting a complex spatial  
22 and differential distribution of the tentative viruses, encompassing the spider brain and also silk and  
23 venom glands. Until recently, the virus landscape associated to spiders remained elusive. The  
24 discovered viruses described here provide only a fragmented glimpse of the potential magnitude of the  
25 *Aranea* virosphere. Future studies should focus not only on complementing and expanding these  
26 findings, but also on addressing the potential ecological role of these viruses, which might influence  
27 the biology of these outstanding arthropod species.

## 28 1 Introduction

29       Recent advances in low-cost high-throughput metatranscriptomic sequencing is revolutionizing  
30 our understanding of the RNA virosphere. A considerable advancement by Li et al, (2015) depicted an  
31 unprecedented diversity of negative strand RNA viruses in arthropods. In addition, the same group (Shi  
32 et al, 2016) has recently reported more than 1.5 k RNA virus species infecting over 220 arthropods.  
33 These studies have shifted the paradigm of invertebrate virology, revealing a viral landscape  
34 phylogenetically and genomically diverse. Arthropods are an important source of virus diversity, and  
35 invertebrate virology is a flourishing and dynamic research field. In the past few years, the first spider  
36 infecting viruses have been described. Li et al (2015) identified seven species of ssRNA(-) viruses in  
37 pooled RNA samples encompassing five spider species: *Neoscona nautica*, *Parasteatoda*  
38 *tepidariorum*, *Plexippus setipes*, *Pirata sp.*, and an unidentified *Araneae*. The viruses were assigned to  
39 the *Mononegavirales* order, two *Nairovirus* like and a *Plebovirus* like (*Bunyavirales*), an  
40 *Orthomyxoviridae* like and a new genus of non-segmented circular RNA viruses: *Chuvirus*.  
41 Remarkably, employing the same RNA library Shi et al (2016), pinpointed a ca. 80 collection of new  
42 virus species derived from spiders, corresponding to a wide range of RNA virus lineages, enriched in  
43 *Partitiviridae* and *Picornavirales* like viruses. In addition, Shean et al (2017) described six novel  
44 *Picornavirales* members from six different spider species found in Washington State. The viruses were  
45 identified in metagenomics libraries of the mygalomorph spider *Hexura picea*; the *Tetragnathidae*  
46 orbweaver *Metellina curtisi*; the triangle-weaving orbweaver *Hyptiotes gertschi*; the cobweb weaver  
47 *Theridion simile* and the crab spider *Xysticus cristatus*. The identified viruses presented low sequence  
48 similarity to reported picornaviruses (24%-47% by amino acid to the polyprotein) and phylogenetic  
49 analyses suggested they form a new clade within the *Picornavirales* order. The preceding studies have  
50 inaugurated *Araneae* virology by assessing the RNA landscape of only a dozen spiders. There are ca.  
51 45.7 k spider species described, undoubtedly representing a massive reservoir of virus diversity, which  
52 remains unexplored.

53       The golden orb-weaver *Nephila clavipes* (Linnaeus, 1767) is a female-biased sexual-size  
54 dimorphic spider (Kuntner, 2009). It is a widespread and abundant species, distributed from  
55 southeastern United States to northern Argentina and from the Galapagos Islands to the Caribbean.  
56 They inhabit a broad range of habitats that vary from mild to strong seasonality (Higgins, 2000). *N.*  
57 *clavipes* spiders use golden-colored silks to spin orb webs. They are opportunistic predators, capturing  
58 diverse arthropods, and even small vertebrates (Higgins et al., 1992). Spider silks have a great potential  
59 for medical and industrial innovation, given their features of being both extremely strong and light



60 (Agnarsson et al., 2010). *N. clavipes* generates a battery of silks derived from seven types of araneoid  
61 silk glands. This extensively studied species is considered the “ubiquitous workhorse of silk spider  
62 research” (Vollrath, 2000; Kaplan et al., 1993). Despite the importance of this orb-weaver spider, the  
63 molecular characterization of its genetic repertoire was lacking in the literature. Babb et al (2017)  
64 recently reported a sequencing *tour de force* that generated the first annotated genome of *N. clavipes*.  
65 Besides generating a genome assembly of 2.8 GB, the authors explored the RNA component of *N.*  
66 *clavipes* by multiple RNA-seq data from 16 different tissue/organ/individual isolates (whole body,  
67 brain, and silk and venom glands) collected from four female individuals. These  $1.53 \times 10^9$  reads  
68 corresponding to an assembly of 1.5 million transcripts, which represent the most extensive deposited  
69 RNA assembled data of any organism at the NCBI TSA database, were used as input for the objective  
70 of this study: The first identification and characterization of potential RNA viruses associated to *N.*  
71 *clavipes*.

## 72 2 Materials and Methods

73 In order to identify putative RNA virus associated with *N. clavipes*, the RNA data from Babb  
74 et al (2017) were integrated into *de novo* assembled transcriptomes generated for each isolate using  
75 strand-specific, ribosomal RNA (rRNA)-depleted, 100-bp paired-end reads. In sum, a total of  
76 1,848,260,474 raw RNA reads were quality controlled and filtered, and the curated 1,531,402,748 reads  
77 were *de novo* assembled using Trinity (rel\_2.25.13) yielding 1,507,505 unique strand-specific  
78 transcripts. These  $1.53 \times 10^9$  reads corresponding to an assembly of 1.5 million transcripts from Babb  
79 et al (2017) were used as input for virus discovery. In addition, the complete NR release of viral protein  
80 sequences was retrieved from [https://www.ncbi.nlm.nih.gov/protein/?term=txid10239\[Organism:exp\]](https://www.ncbi.nlm.nih.gov/protein/?term=txid10239[Organism:exp]).  
81 The *N. clavipes* 1.5 million transcripts RNA assembly was assessed by multiple TBLASTN searches  
82 (max e-value =  $1 \times 10^{-5}$ ) using as probe the complete predicted non redundant viral proteins in a local  
83 server. Significant hits were explored by hand, and redundant contigs discarded. Potential virus genome  
84 segments sequences were curated by iterative mapping of reads using Bowtie 2 v2.3.2 [http://bowtie-](http://bowtie-bio.sourceforge.net/bowtie2/index.shtml)  
85 [bio.sourceforge.net/bowtie2/index.shtml](http://bowtie-bio.sourceforge.net/bowtie2/index.shtml). To identify/rule out additional segments of no homology to  
86 the closely associated viruses I used diverse *in silico* approaches based on RNA levels by the  
87 sequencing depth of the transcript, predicted gene product structure, domain architecture, or conserved  
88 genome termini, and significant co-expression levels with the remaining viral segments. Potential open  
89 reading frames (ORF) were predicted by ORFfinder. Translated putative proteins were blasted against  
90 the non-redundant protein sequences NR database and best hits were retrieved. Predicted proteins were  
91 subjected to a domain-based Blast search against the Conserved Domain Database (CDD) v3.16

92 <https://www.ncbi.nlm.nih.gov/Structure/cdd/cdd.shtml> and integrated with SMART <http://smart.embl->  
93 [heidelberg.de/](http://heidelberg.de/), Pfam <http://pfam.xfam.org/> and PROSITE <http://prosite.expasy.org/> to characterize the  
94 functional domains. Secondary protein structure was predicted with Garnier  
95 <http://emboss.sourceforge.net/apps/release/6.6/emboss/apps/garnier.html>, signal and membrane cues  
96 were assessed with SignalP v4.1 <http://www.cbs.dtu.dk/services/SignalP/> and prediction of  
97 transmembrane topology and signal peptides by Phobius <http://www.ebi.ac.uk/Tools/pfa/phobius/>.  
98 RNA secondary prediction was performed with the mfold Web Server  
99 <http://unafold.rna.albany.edu/?q=mfold/rna-folding-form>. Eventually, sequence similarity levels were  
100 visualized using the Circoletto tool with standard parameters <http://tools.bat.infspire.org/circoletto/>  
101 Potential panhandle structures derived from partially complementary virus sequence termini were  
102 assessed with the RNAcifold web server <http://rna.tbi.univie.ac.at/cgi->  
103 [bin/RNAWebSuite/RNAcifold.cgi](http://bin/RNAWebSuite/RNAcifold.cgi). Ribosomal frameshifting events were predicted using the  
104 KnotInFrame tool <https://bibiserv.cebitec.uni-bielefeld.de/knotinframe>. The potential functions of the  
105 ORFs products were predicted by the annotated data and similarity with known viral proteins. Virus  
106 RNA levels were calculated with Cufflinks <http://cole-trapnell-lab.github.io/cufflinks/> or alternatively  
107 with the Geneious suite 8.1.9 (Biomatters inc.) as Fragments Per Kilobase of virus transcript per  
108 Million mapped reads (FPKM) based on million non-rRNA host transcriptome reads that map to the  
109 host genome assembly NepCla1.0. These normalized values avoid potential inconsistencies associated  
110 to the success of rRNA capture (RNA depleted libraries), the presence of other viruses and the diluting  
111 effects of variable non-host levels of reads. Tentative virus detections were contrasted on the *N.*  
112 *clavipes* NepCla1.0 genome assembly (NCBI accession no. GCA\_002102615.1, 2.4Gb) by BLASTN  
113 searches (E-value =  $1e10^{-6}$ ) and inspected by hand to rule out the identification of transcripts  
114 associated to putative integrated viruses or endogenous viral-like elements (EVE). In addition, the  
115 complete DNA derived raw read collection of Babb et al (2017) was mapped to the identified viruses  
116 to rule out unassembled EVEs. Amino acid sequences of the predicted viral polymerases or capsid  
117 proteins were used for phylogenetic analyses based on MAFFT 7.310 alignments  
118 <http://mafft.cbrc.jp/alignment/software/> and unrooted FastTree maximum-likelihood phylogenetic  
119 trees <http://www.microbesonline.org/fasttree/> with standard parameters. FastTree accounted for  
120 variable rates of evolution across sites by assigning each site to one of 20 categories, with the rates  
121 geometrically spaced from 0.05 to 20 and set each site to its most likely category by using a Bayesian  
122 approach with a gamma prior. Support for individual nodes was assessed using an approximate  
123 likelihood ratio test with the Shimodaira-Hasegawa like procedure. Tree topology, support values and

124 substitutions per site were based on 1,000 tree resamples. Most sequence analyses results were  
125 integrated into the Geneious suite 8.1.9 (Biomatters inc.)

126 Based on sequence similarity to best hits, sequence alignments, predicted proteins and domains,  
127 and phylogenetic comparisons to reported species based in MAFFT and FastTree, I found evidence of  
128 10 diverse new virus species and 3 new strains of reported virus species associated to *N. clavipes*.

## 129 **3 Results and Discussion**

### 130 **3.1 *Nephila clavipes* Picornavirales like viruses**

131 TBLASTN searches rendered sequences that could be linked to ssRNA positive strand viruses,  
132 most specifically to the *Picornavirales* order (Le Gall et al., 2008). These sequences were tentatively  
133 assigned to four putative new virus species. The proposed *Nephila clavipes* picorna-like virus 1  
134 (NcPV1) is predicted to have a 10,198 nt long genome, presenting a single ORF between coordinates  
135 761-10,147, encoding a putative 357.963 kDa and 3,128 aa long polyprotein. Domain prediction based  
136 on InterproScan, NCBI-CD database v3.15, THHM, PHOBIUS, SMART, Pfam, PROSITE and  
137 Garnier resulted in the identification of diverse motifs associated to *Picornavirales* coat and replicase  
138 proteins (RP) (Figure 1.A; Supp. Table 1). In addition, NcPV1 is similar to Wuhan spider virus 2  
139 (WSV2) (Pairwise % Identity: 56.6% at the RNA level, and 39.5% at the predicted polyprotein level).  
140 WSV2 is currently unclassified, but tentatively assigned to the *Picornavirales*, within a newly proposed  
141 super clade of Picorna-Calici by the reporting authors (Shi et al., 2016). It is important to highlight that  
142 WSV2 was identified recently from a RNA pooled sample, a sequencing library made up by individuals  
143 of diverse classified and unclassified spiders: *Neoscona nautica* (14), *Parasteatoda tepidariorum* (3),  
144 *Plexippus setipes* (3), *Pirata sp.* (1), and 8 unrecognized individuals (*Araneae sp.*) (Shi et al., 2016).  
145 Thus, the specific host of WSV2 remains to be determined, even at the family level, which could  
146 contribute to the understanding of the evolutionary history of these viruses and their hosts.

147 *Nephila clavipes* picorna-like virus 2 (NcPV2) shares the proposed Picorna-Calici ssRNA(+) super  
148 clade with NcV1, but presents a different genome organization and domain architecture (Figure 1.A,  
149 Supp. Table 2). NcPV2 presents an 11,699 nt RNA genome enclosing 4 putative ORFs. ORF1 (722-  
150 7,226 nt coordinates) encodes a putative RP of 274 kDa and 2,412 aa long. NcPV2 ORF2 (7,948-  
151 9,747 nt) encodes a putative 67.3 kDa coat protein, 599 aa long. ORF3 (9,792-10,562 nt) encodes a  
152 27.7 kDa, 256 aa long protein similar to the hypothetical protein 3 of Hubei picorna-like virus 76 (E-  
153 value = 8e-14, 38% identity) and of Wuhan spider virus 6 (WSV6; E-value = 8e-14, 38% identity),

154 both of unknown function. ORF 4 (10,702-11,457 nt) encodes a 29.7 kDa, 251 aa long protein, with a  
155 central coiled-coil region, and of unknown function. Although it is evident that NcPV1 and NcPV2  
156 share several conserved domains, probably suggesting a common origin, their divergent spatial  
157 arrangement and their low sequence identity might be interpreted as an separation followed by  
158 recombination and reorganization of the putative proteins on the respective viruses. NcPV2 is similar  
159 to WSV6 (Pairwise Identity: 51.7% at the RNA level, and 28.5% at the predicted replicase protein).  
160 WSV6 was also recently identified from a pooled sample library of individuals of diverse spiders, and  
161 has been provisionally assigned to a Picorna-calici superclade. Its specific host spider remains  
162 unidentified.

163 An additional picorna-like virus could be associated to *N. clavipes*. NcPV3 is predicted to have a 9,141  
164 nt long genome, presenting a single ORF between coordinates 680-8,914, encoding a putative 312.010  
165 kDa and 2,744 aa long polyprotein presenting several *Picornavirales* associated domains (Figure 1.A;  
166 Supp. Table 3). The domain architecture of NcPV3 is equivalent to that of NcPV1, however their  
167 polyprotein similarity is low (20.6 % at the aa level), strongly suggesting that they are separate species.  
168 NcPV1-3 shared a characteristic long 5'UTR ranging from 620 to 760 nt. These particularly long UTRs  
169 could be associated to the cap-independent internal initiation of translation associated to picornaviral  
170 RNA, based on internal ribosome entry site (IRES) (Pilipenko et al., 1994). The 5' non-translated  
171 region of NcPV1-3 resembles IRES by presenting a complex clover leaf like secondary structure,  
172 encompassing A+U rich hairpins, and presenting several UUUA loops found typically in  
173 *Picornavirales* (Figure 1.B and D; Pilipenko et al., 1989). Blastp searches using the RP indicate that  
174 NcPV3 shares 48 % similarity with the RP of Washington bat picornavirus (WBPV; E-value = 0.0;  
175 GenBank KX580885.1). WBPV was released to GenBank last year by the University of Washington  
176 Virology NGS group, and identified in a bat RNA library, but there is no related literature available.  
177 Interestingly, NcPV3 RP shares 41% similarity (E-value = 0.0) to Hubei tetragnatha maxillosa virus 3,  
178 which was reported by Shi et al (2016), and identified in a *Tetragnatha maxillosa* (*Tetragnathidae*)  
179 RNA library. This spider is a member of the *Araneoidea* superfamily, which includes the *Araneoidea*  
180 family, thus it is the closest spider to *N. clavipes* in which a virus was identified.

181 *Nephila clavipes* picorna-like virus 4 (NcPV4) shares the genome architecture of NcPV2. NcPV4  
182 presents an 11,237 nt RNA genome enclosing 4 putative ORFs. NcPV4 ORF1 encodes a 2,533 aa long  
183 replicase protein (Figure 1.A; Supp. Table 4). NcPV4 ORF2 encodes a putative coat protein, 539 aa  
184 long similar to Wuhan spider virus 4 (WSV4) capsid protein (E-value = 1e-83, id 33%). NcPV4 ORF3  
185 encodes a 202 aa protein similar to WSV4 hypothetical protein 3, of unknown function (E-value = 1e-

186 20, id 49%). The 360 aa protein encoded in ORF4 shares no significant similarity to known proteins.  
187 NcPV1-NcPV3 and NcPv2-NcPV4 not only share genome organization, but also presents higher levels  
188 of similarity at their respective replicases, and sequence identity is significantly higher in equilocal  
189 regions suggesting a shared protein architecture (Figure 1.C). NcPV1-4 were explored by maximum  
190 likelihood phylogenetic trees derived from MAFFT alignments of their RPs, which showed that they  
191 cluster among several newly found picorna-like invertebrate viruses (Figure 1.E-F: Supp. Figure 1-3).  
192 Moreover, NcPV1-4 are separated in divergent sub-groups within this picorna-like clade. Even though  
193 the *N. clavipes* viruses are more closely related to unclassified *Picornavirales*, by generating  
194 phylogenetic trees based in assigned species I could hint some tentative affinities of the identified  
195 viruses with specific viral families. NcPV1 appears to be more closely related to the *Iflaviridae* family  
196 of *Picornavirales*, clustering among diverse invertebrate picornaviruses, and within a specific  
197 phylogroup of ticks, flies, odonata and spiders proposed picornaviruses, having as nearest neighbor the  
198 spider derived WSV2. NcPV3 clusters in a lineage of unclassified *Picornavirales* with affinity to the  
199 *Iflaviridae*. Interestingly, this new phylogroup, composed also by bat and centipede viruses, is highly  
200 enriched with spider derived viruses (11 of 16 viruses). NcPV2 and NcPV4 appear to be more closely  
201 related to a distinctive phylogroup of unclassified *Picornavirales*, which diverges branching between  
202 the *Dicistroviridae* and the *Marnaviridae* families of viruses. This phylogroup is enriched with  
203 *Myriapoda* derived viruses, however among NcPV2 and NcPV4 distinctive subgroups there are several  
204 spider derived viruses, such as WSV4, WSV5 and WSV6. There appears to be some distinguishing  
205 cues in the replicase sequences of arthropod picorna-like viruses, which is reflected in the particular  
206 clustering correlated with evolutionary history of putative hosts in phylogenetic trees. It is worth noting  
207 that these unclassified picorna-like viruses have been identified in broad non-targeted transcriptomic  
208 studies, and the biological and ecological implications of the virus presence remains unclear. The  
209 associated literature is exceptionally limited; thus until future studies explore the potential impact of  
210 these viruses on their host, it might be prudent not to speculate on their biology. Distant virus species  
211 of this order have been studied in more detail, such as *Acute bee paralysis virus* (*Picornavirales*;  
212 *Dicistroviridae*; *Aparavirus*) or *Sacbrood Virus* (*Picornavirales*; *Iflaviridae*; *Iflavirus*) which are  
213 reported to have drastic effects on their bee host, resulting in larvae death and sudden colony collapse  
214 (Govan et al., 2000; Ghosh et al., 1999).

### 215 3.2 *Nephila clavipes* Virgaviridae-like viruses

216 The putative *Nephila clavipes* virga-like virus 1 (NcVV1) is predicted to have a 10,569 nt long  
217 ssRNA (+) strand genome, presenting two partially overlapping ORFs, and three additional ORFs.



218 ORF1 (9-6,809 nt coordinates) encodes a putative replicase protein (RP) of 260.4 kDa and 2,266 aa  
219 long (Figure 2.A; Supp. Table 5). ORF2 (6,736-8,088 nt coordinates), which is tentatively translated  
220 by ribosomal frameshifting, encodes a 51.8 kDa, 450 aa long hypothetical protein, sharing significant  
221 identity with the virion structural glycoprotein s2gp2 (E-value =  $3e-05$ , 41% identity) corresponding  
222 to RNA 2 of the bisegmented *Chronic bee paralysis virus* (CBPV). To date, the ssRNA(+) CBPV  
223 remains unclassified by the International Committee on Taxonomy of Viruses (ICTV), and only its RP  
224 sequence presents similarities with members of the *Nodaviridae* and *Tombusviridae* families. It has  
225 been suggested that CBPV might be the prototype species of a new family of positive single-stranded  
226 RNA viruses (Olivier et al., 2008). ORF3 encodes a 177 aa protein presenting a SP24 domain of virion  
227 membrane proteins similar to the hypothetical protein 3 of Lodeiro virus (LV, E-value =  $6e-33$ , id  
228 41%). ORF4 and ORF5 encode a 423 and 102 aa hypothetical proteins of unknown function. NcVV1  
229 shares with LV 51.8% nt sequence identity at the RNA level, and 28.4% at the RP protein. RP based  
230 phylogenetic trees, suggest that NcVV1 is further related to *Virgaviridae* distant like viruses, forming  
231 distinctive clusters of invertebrate viruses, such as the mosquito derived *Negevirus*. NcVV1 forms a  
232 divergent phylogroup with the proposed LV (Figure 2.B-C; Supp. Figure 4-6). LV is an unclassified  
233 virus that has been recently reported to be derived from the crab spider *Philodromus dispar*  
234 (*Philodromidae*) (Shean et al., 2017).

235 *Nephila clavipes* virga-like virus 2 (NcVV2) shares with NcVV1 a super clade of Virga-like  
236 viruses. However the divergent NcVV2 clusters within a distinct group of ssRNA(+) viruses, some of  
237 them associated with nematodes, such as the recently reported Xinzhou nematode virus 1 (XzNV1)  
238 and Xingshan nematode virus 1 (XgNV1; Shi et al., 2016). Interestingly, the most closely related  
239 viruses based on replicase derived phylogenetic trees, correspond to two virga-like viruses derived  
240 from spiders: Hubei virga like virus 13 and 14 (Figure 2.B-C). NcVV2 presents an 11,919 nt ssRNA(+)   
241 genome enclosing three putative ORFs, of similar size and organization as XzNV1 and XgNV1. ORF1  
242 (90-8,843 nt coordinates) encodes a putative replicase protein (RP) 334.9 kDa and 2,917 aa long  
243 (Figure 2.A; Supp. Table 6). NcVV2 ORF2 (8,934-11,051 nt) encodes a putative 80.7 kDa, 705 aa  
244 long hypothetical protein similar to the hypothetical protein 2 of Hubei virga-like virus 13 (E-value =  
245  $2e-108$ , 35% identity). ORF3 (11,084-11,818 nt) encodes a 27.3 kDa, 244 aa long protein, akin to the  
246 hypothetical protein 3 of XgNV1 (E-value =  $1e-20$ , 32% identity).

247

### 248 **3.3 *Nephila clavipes* bunya-like virus**

249 The putative *Nephila clavipes* bunya-like virus (NcBV) is predicted to have a segmented  
250 genome. Sequence analyses resulted in the identification of two genome segments, tentatively assigned  
251 as genomes L and G. Genome segment L of NcBV is 7,365 nt long, presenting a single ORF between  
252 coordinates 56-7,285 nt (3' to 5' orientation), encoding a putative 278.9 kDa and 2,409 aa long  
253 polyprotein (Figure 3.A; Supp. Table 9). Based on phylogenetic trees of the putative polyprotein,  
254 NcBV appears to be an ssRNA(-) virus, distantly related to the *Bunyavirales* order. NcBV predicted  
255 protein resembles the RdRP encoded typically in the Large genome segment of these multipartite  
256 viruses. Nevertheless, NcBV is more similar to several new “bunya-like RNA viruses” of diverse  
257 number of genome segments. Genome segment G of NcBV is 4,633 nt long, encoding a single 1,465  
258 aa protein presenting a N-terminal integral transmembrane signal and a Nairovirus\_M domain  
259 suggesting that this potential glycoprotein is associated to viral attachment and membrane fusion.  
260 Relaxed sequence TBLASTN searches based on Ns, Nm proteins of multipartite related *Bunyavirales*,  
261 co-expression retrieval of related transcripts, or domain based searches failed to retrieve any other  
262 potential gene segments of NcBV. L protein alignments of type species of the 9 *Bunyavirales* families  
263 and NcBV suggest a conservation of diverse motifs associated to the RDRP function of this protein  
264 (Figure 3.B). NcBV L protein presents an N-Terminal, Influenza-Like Endonuclease domain, essential  
265 for viral cap-dependent transcription (Reguera et al, 2010), and the functional motifs A-E of  
266 *Bunyavirales* polymerases (Kukkonen et al, 2005). *Bunyavirales* vRNAs present highly conserved,  
267 quasi-complementary 3' and 5' non-translated genome extremities, usually extending 13–19  
268 nucleotides, which function as the promoter (Barr & Wertz, 2004). vRNA genome segments are  
269 packaged by multiple copies of the viral nucleoprotein together with the RdRP into filamentous  
270 ribonucleoprotein particles (RNPs), forming the functional replication and transcription units. The  
271 RNPs are circularized, by base pairing between the genome ends, forming a double-stranded  
272 “panhandle” mediating binding of both ends to the RdRP (Gerlach et al, 2015). NcBV L and G vRNAs  
273 present highly complementary genome termini, extending over 30 nt. In addition, RNA secondary  
274 predictions of potential duplex vRNAs suggest a stable, low FME structure supporting their putative  
275 role as promoter and tentative cues of *Bunyavirales* like replication (Figure 3.B). Phylogenetic trees of  
276 related virus sequences, suggest that NcBV might be a member of a new clade of invertebrate bunya-  
277 like divergent viruses, pivoting distantly to *Phasmaviridae*, *Nairoviridae*, and *Hantaviridae* (Figure  
278 3.D-E; Supp. Figure 7-9). NcBV and related unclassified invertebrate bunya-like viruses cluster into a  
279 highly divergent clade which may eventually grant the proposal of a new family within the  
280 *Bunyavirales* order.

### 281 3.4 *Nephila clavipes* *Reoviridae*-like viruses

282 Sequence similarity searches resulted in the identification of numerous transcripts showing  
283 sequence identity to members of the *Reoviridae* virus family. *Reoviridae* are dsRNA, multipartite, non-  
284 enveloped, icosahedral capsid viruses (King et al, 2011). Based on sequence similarities with described  
285 viruses, co-expression levels and the pattern of presence or absence in diverse *N. clavipes* RNA  
286 libraries, and phylogenetic insights, the identified virus transcripts could be assigned to two tentatively  
287 new *Reoviridae* like species. The proposed *Nephila clavipes* reo-like virus 1 (NcRV1) is predicted to  
288 have a multisegmented dsRNA genome. RNA segment 1 is 4,060 nt long, presenting a single ORF  
289 between coordinates 10-4,005 nt, encoding a putative 152.4 kDa, 1,331 aa long RP (Figure 4.A).  
290 NcRV1 RP appears to be highly divergent, BLASTP searches using the RP showed similarities to the  
291 RNA segment 1 of *Homalodisca vitripennis reovirus* (*Reoviridae*; *Sedoreovirinae*; *Phytoreovirus*)  
292 sharing a 23% aa identity (E-value = 3e-26). Hidden Markov Models (HMM) searches hint that the  
293 NcRV1 RP is similar to the Hubei reo-like virus 10 (HrIV10) RdRP (E-value = 4e-35), a recently  
294 described dsRNA *Reoviridae* like virus found in a *Odonata* (*Odonatoptera*) RNA pooled library (Shi  
295 et al., 2016). NcRV1 RNA segment 2 is 2,617 nt long, presenting a single ORF encoding a putative  
296 core protein of 93.7 kDa and 831 aa long. NcRV1 core protein is similar (E-value = 4e-11, pairwise  
297 identity 22%) to the putative minor capsid protein of Hubei reo-like virus 11. *Reoviridae* are  
298 multipartite viruses composed of ca. 10 dsRNA genome segments. Nevertheless, there are only two  
299 virus segments available for HrIV10 encoding a RP and a second RNA genome segment encoding a  
300 minor structural protein. Given the high divergence of NcRV1 with reported virus species, subsequent  
301 sequence analyses focused on co-expression levels of virus derived RNA levels, allowed to predict two  
302 additional tentative genome segments of NcRV1. Genome segment 3 of NcRV1 is 4,302 nt long,  
303 encoding a single 1,410 aa protein, similar to the hypothetical protein 4 of Hubei odonate virus 14  
304 (Hov14, 23% similarity). Hov14 was identified in a dragonflies and damselflies pooled RNA library;  
305 thus its specific host remains unclear. Hov14 has been tentatively assigned to the reovirus-like  
306 superclade by Shi et al (2016). The NcRV1 genome segment 3 encoding protein is tentatively  
307 structural. Genome segment 4 is 1232 nt long encoding a single 365 aa protein, similar to the structural  
308 protein VP8 (26.1 % identity, E-value = 5.96e-02) of the *Reoviridae* *Banna virus* (BAV-  
309 *Seadornavirus*). BAV has been isolated from ticks and from humans suffering from  
310 meningoencephalitis (Attoui et al., 2000). VP8 is proposed to be the major virion protein of outer layer  
311 BAV viral particles, based on sequence similarity to VP6 of rotaviruses (Jaafar et al., 2005). An  
312 additional reo-like virus was detected in *N. clavipes*. *Nephila clavipes* reo-like virus 2 is composed of



313 10 dsRNA genome segments ranging between 1,096 and 3,837 nt long, generating a total genome  
314 length of ca. 23.6 kbps. Given the significantly low levels of NcRV2 vRNA in the *N. clavipes* libraries,  
315 genome segments were reconstructed by iterative mapping of reads to partial transcripts, resulting in a  
316 low coverage of the genome segments (ranging from only 12X to 20X). Segments 1 to 9 of NcRV2  
317 segment presented a single ORF encoding a set of proteins which shares significant similarity (30% to  
318 74% at the aa level) with the cognate proteins of Bloomfield virus, a proposed Reovirus, yet  
319 unclassified, described recently to be derived from a pooled sample of diverse wild caught *Drosophila*  
320 sp. flies (Webster et al, 2015). Additionally, segment 10 739 aa gene product shares similarity (E-value  
321 = 6.00e-37, id 29%) with the hypothetical protein encoded in RNA 3 of Hov14. Structural and  
322 homology based annotation rendered only a few signatures that could envision the functions of the  
323 divergent gene products of NcRV2. Homology detection and structure prediction with the HMM tool  
324 HHPred suggest that the gene products of RNA 2 and RNA 3 could have a structural function and that  
325 RNA 6 might be involved in methylation. Future studies could expand the current limited sequences  
326 reference set associated to these cluster of viruses, which might lead, in turn, to the eventual  
327 identification of highly divergent potential virus segments that should not be ruled out this soon, based  
328 on absence of evidence. RPs based phylogenetic trees hint that NcRV viruses form two divergent  
329 clusters within the *Reoviridae*, supporting their potential assignment to two new clades of invertebrate  
330 reo-like viruses (Figure 4.B-C; Supp. Figure 10-12). NcRV1 clusters into a divergent group of  
331 invertebrate viruses with affinity to the *Phytoreovirus* genus of plant infecting and insect vectored  
332 *Reoviridae*. Furthermore, NcRV2 is more closely related to another phylogroup of unclassified  
333 invertebrate viruses, linked to the *Fijivirus* genus of insect vectored, plant infecting *Reoviridae*. These  
334 incipient clusters of unclassified invertebrate viruses expand the diversity and evolutionary complexity  
335 within the *Reoviridae* family.

### 336 3.5 *Nephila clavipes* *Astroviridae*-like virus

337 A highly divergent tentative virus transcript was identified in the *N. clavipes* RNA libraries.  
338 After further analysis involving genome architecture, gene product similarities with reported species,  
339 and phylogenetic insights based on a putative RdRP, I concluded that the sequence corresponded to a  
340 new species distantly related to the *Astroviridae* family, sharing some affinities also with the  
341 *Alphatetraviridae* family of viruses. *Astroviridae* were firstly described as electron microscopy  
342 detected particles with a "star-shaped" surface structure in stool samples from children with diarrhea.  
343 Astroviruses are spherical non-enveloped, 35-nm capsid with T=3 icosahedral symmetry, single-

344 stranded RNA viruses (Monroe et al, 1993). Their monosegmented genome presents two partially  
345 overlapping ORFs that encode a protease and an RdRP (ORF1a-b) followed by a capsid precursor  
346 encoding ORF (ORF2) which is expressed as a subgenomic RNA (King et al, 2011). The *Nephila*  
347 *clavipes* astro-like virus (NcAV) presents a monopartite ssRNA(+) 7,569 nt long genome. NcAV  
348 presents two partially overlapping ORFs (ORF1a-b) followed by ORF2. Based on sequence analyses,  
349 ORF1a-b appear to encode a fusion protein of 1,756 aa generated by -1 ribosomal frameshifting (RF)  
350 (Figure 5.A). *Astroviridae* -1 RF is induced by a heptanucleotide “slippery sequence” of the form  
351 A\_AAA\_AAC, followed downstream by a RNA H-type pseudoknot structural element. The ribosome  
352 is stalled on the slippery sequence by the pseudoknot structure in 3'. In some cases, the ribosome would  
353 backtrack one nt, generating one mismatch between the cognate tRNA and the vmRNA. Thus,  
354 translation resolves on the backtracked ribosome in the -1 frame (Lewis & Matsui, 1995). Interestingly,  
355 -1 RF searches suggest that the corresponding slippery sequence of NcAV differs from that of  
356 *Astroviridae*, and is identical to the sequence of *Human immunodeficiency virus 1* (*Retroviridae*;  
357 *Lentivirus*) and *Sindbis virus* (*Togaviridae*; *Alphavirus*) (U\_UUU\_UUA). The heptanucleotide signal  
358 cue is supported by the presence of a highly stable H-type pseudoknot immediately downstream the  
359 slippery sequence (Figure 5.B). HHpred searches indicate that NcAV ORF1a presents a central serine  
360 peptidase region (with HDS catalytic triad) and a C-terminal zinc-binding motif/RNA binding  
361 suggesting that ORF1a is probably processed into at least three products (Figure 5.A; Supp. Table 10).  
362 ORF1b shares sequence similarity with Hubei leech virus 1 (HLV1 - E-value = 2.00e-16, id 29%), a  
363 proposed astro-like virus identified by Shi et al (2016). Intriguingly, ORF2 encodes a 648 aa capsid  
364 like protein, sharing sequence and structural similarity to the capsid protein of *Nudaurelia capensis*  
365 *omega virus* (NucOV), the type species of the *Omegatetravirus* genus of *Alphatetraviridae*.  
366 Interestingly, *Alphatetravirus* capsids present a T=4 icosahedral symmetry whereas *Astrovirus* capsids  
367 are T=3. NucOV coat protein assembles into a stable particle called the procapsid, which is 450 Å in  
368 diameter. Lowering the pH to 5.0 leads to a conformational change and maturation of the capsid,  
369 mediated by an autoproteolytic cleavage dependent on the presence of an Asn-570, which is at the  
370 cleavage site (Taylor et al, 2002). This residue is conserved in *Alphatetraviruses*, NcAV and two  
371 related unclassified viruses HLV1 and Hubei astro-like virus (Figure 5.D). The 3' UTR of *Astroviridae*  
372 immediately adjacent to the poly(A) tail share a conserved secondary structure made up of three stem  
373 loops. This structure, reminiscent of the IRES *Picornavirales* region, is involved in virus replication  
374 (Monroe et al, 1993). NcAV presents a highly stable triple stem loop predicted RNA structure at its 3'  
375 termini (Figure 5.C). Moreover, stem-I of NcAV presents at an equilateral region a UCUU motif. In  
376 *Human astrovirus 8*, stem-I UCUU mediates Polypyrimidine-Tract-Binding protein (PTB) binding to

377 the 3' UTR, which is required for Astrovirus replication (Espinosa-Hernández et al, 2010). RP and CP  
378 phylogenetic trees were generated to gain insights about the potential taxonomy of this divergent virus  
379 (Figure 5.E-F; Supp. Figure 13-15). RP based trees suggest that NcAV is distantly related to  
380 *Astroviridae*, clustering in a distinctive clade of invertebrate derived viruses, extensively separated  
381 from the mammal (*Mamastrovirus*) and bird (*Avastrovirus*) infecting *Astroviridae*. CP based trees add  
382 some complexity to the picture (Figure 5.F). NcAV also clusters within a new group of invertebrate  
383 viruses, but it appears to branch more closely to *Alphatetraviridae*, *Permutotetraviridae* and *Sinaivirus*  
384 than to *Astroviridae*. Future studies should complement the results reported here, which may lead to a  
385 better understanding of the evolutionary history and taxonomical assignment of NcAV and related  
386 viruses.

387  
388 In addition to the tentative new virus species detected, new strain of reported invertebrate virus  
389 associated to *N. clavipes* were identified and are presented as Supplementary Data 1. It is worth  
390 mentioning that every detected potential virus sequence was assessed on the whole genome assembly  
391 of *N. clavipes* (NepCla1.0; GenBank accession GCA\_002102615.1; Babb et al., 2017) and no evidence  
392 that the tentative viruses could be derived from integration of virus-related sequences into the genome  
393 were found. Moreover, the complete collection of raw DNA sequencing data, ascending to a total of  
394 4,094,217,472 read pairs were mapped to the identified viruses to explore the potential presence of  
395 unassembled virus like DNA. No virus like sequences were detected on the raw data of Babb et al.,  
396 (2017). Furthermore, the facts that the detected virus sequences corresponded to the full length of the  
397 putative virus, present unaltered encoding and spacer regions, and maintain the typical domain  
398 architecture of related viruses, support the assumption that the identified sequences correspond to *bona*  
399 *fide* extant *N. clavipes* viruses. Moreover and importantly, in the case of multi-segmented nature  
400 viruses (*Partitiviridae*, *Reoviridae*), the corresponding and expected segment RNAs were found as  
401 independent units, presenting expected UTRs, ORFs and predicted gene products and shared a dynamic  
402 pattern of presence/absence and co-expression levels in the diverse RNA libraries.

403

### 404 **3.6 Tissue/Organ presence and RNA levels of *N. clavipes* viruses**

405 The *N. clavipes* multiple RNA-seq data derived from 16 different tissue/organ/individual  
406 isolates (whole body, brain, and individual silk and venom glands) collected from four female  
407 individuals (Babb et al., 2017) allowed for the first time to address the presence of a spider virus RNA

408 at the tissue/organ level (Figure 6; Supp. Figure 21; Supp. Table 11). Virus levels were expressed as  
409 FPKM, mean coverage calculated, variants/polymorphism estimated among samples, and the tentative  
410 virus sequences were curated based on base frequency. Virus transcript presence and levels were  
411 complex, consistent, and varied by species, individuals and tissue/organs assayed. A total 5,286,563  
412 absolute reads were assigned to be derived from viruses. RNA differential accumulation could be  
413 associated to specific virus species independently of taxonomy associations. For instance, in terms of  
414 absolute virus reads NcPV2 and NcRV1 accumulated at high levels (a total of 188.7 and 151.2 million  
415 nt among samples), while NcPV4 and NcRV2 accumulated at low viral titers (1.35 and 0.33 M nt;  
416 Figure 6.A). Essentially, virus derived RNA were retrieved on every sample, and to my knowledge this  
417 is the first time that a virus derived nucleic acid is detected specifically in silk and/or venom glands,  
418 and in the brain of spiders (Figure 6.B). If virus presence is estimated at the individual spider level,  
419 NcPV1 and NcPV2 were conclusively detected in every female spider sample, at different transcript  
420 levels, which varied in relation with the sampled organ (Figure 6.C-D, F). NcAV was detected in most  
421 spiders but not in Nep-7. NcVV2 and NcBV were detected in both Nep-7 and Nep-9 (Figure 6.D,F).  
422 HvlV11 (Ncs) was detected in Nep-8 and Nep-9, WFV6 (Ncs) only in Nep-9 and RMV (Ncas) only in  
423 a specific silk library of Nep-9 (Figure 6.C). Notably, the detection and RNA levels of multipartite  
424 predicted viruses (NcRV1, NcRV2, NcBV and WFV6) were consistent for the corresponding RNA  
425 genome segments among samples, independently confirming virus presence on selected libraries  
426 (Figure 6.D, G). It is important to highlight that the RNA virus estimated loads differed significantly  
427 among samples. For instance, NcPV1 levels were relatively high among most tissue samples but not  
428 on brain samples. On the contrary, NcRV1 levels were relatively low among samples, but strikingly  
429 spiked specifically on brain tissues, as is the case for NcPV2 on the Nep-8 sample. In general, as a  
430 whole, the presence of virus RNA was significantly accumulated in additional magnitude at the brain  
431 tissue, ascending in one sample to a striking ca. 6.1 % of total detected RNA reads (Figure 6.D, E).  
432 The biological significance of this finding, though interesting, remains unclear. It is tempting to  
433 associate over accumulation of virus RNA levels in the brain with central nervous system (CNS)  
434 immune privilege, a phenomenon widely studied in mammals (Carson et al., 2006). A potential viral  
435 neurotropism could be linked to eventual behavioral altered phenotypes on infected individuals, as is  
436 the case for rabies in mammal hosts (Tsiang et al., 1983). Virus tropism literature on arthropods is  
437 scarce, but there are a few studies exploring tissue specific viruses and its implications. For instance, a  
438 picorna-like virus associated to a braconid wasp parasite, the *Dinocampus coccinellae* paralysis virus  
439 (DcPV), replicates in the host's nervous tissue and induces a severe neuropathy. Interestingly the wasp  
440 transmits the virus to a coccinellid host, the Spotted lady beetle *Coleomegilla maculate*, in which virus

441 replication induces an antiviral immune response that correlates with paralytic symptoms. This  
442 behavior manipulation of the coccinellid, characterized by tremors, gait disturbance and limited  
443 movements, facilitates parasitism and correlates with virus RNA levels in the cerebral ganglia (Dheilly  
444 et al., 2015). This remarkable phenomenon, which Stilling et al (2016) suggest as an example of virus  
445 driven puppeteers of neural function and behaviour, a kind of brain's Geppetto, appear not to be  
446 incidental. The putative neurotropism correlated to neurological symptoms of DcPV has been reported  
447 for other CNS accumulating Picornaviruses, which are implicated in severe paralytic symptoms on  
448 their arthropod hosts. This is the case of the CBPV and of the *Cripavirus Aphid Lethal Paralysis Virus*  
449 (Williamson et al., 1988). It has been suggested that the potential behavioral alteration of virus host  
450 could be induced by the parasites to enhance virus replication and transmission, or a response of the  
451 host to avoid spread of infection. Host manipulation by behavioral alteration could have wide  
452 evolutionary and ecological importance, given the high prevalence of viruses among invertebrates (Han  
453 et al., 2015). Interestingly, the higher replication of DcPV in heads has been correlated with a transient  
454 downregulation of several genes involved in the antiviral response such as Toll 7 and PI3K (antiviral  
455 autophagy) and importantly of Dicer2, Ago2, R2D2 and C3PO (antiviral RNA interference). Therefore,  
456 a reduced RNAi activity at arthropods CNS, which is the primary and most important antiviral immune  
457 response in insects such as *Drosophila* and mosquitoes (Galiana-Arnoux et al., 2006; Blair 2011), could  
458 be linked to an eventual spike in virus RNA levels in CNS. Salazar et al., (2007) report a dynamic virus  
459 presence in midgut and salivary glands. They mention that the mosquito nervous system (used as  
460 control) presented large and persistent amounts of Dengue virus type 2 antigens. Future studies should  
461 assess whether my spider results are specific an anecdotal or if arthropod viruses are in fact over  
462 accumulated in nervous system tissues. Furthermore, the diverse viruses were consistently detected in  
463 the independent silk samples corresponding to the same spider, at a similar FPKM level, suggesting  
464 the accumulation of viruses is more-less steady among the diverse silk glands. Interestingly, virus RNA  
465 was also found in venom glands, NCPV1 being the most abundant. Female *Diachasmimorpha*  
466 *longicaudata* parasitic wasps are associated with two vertically transmitted RNA viruses that are  
467 present in the host venom glands, *D. longicaudata* entomopoxvirus and *D. longicaudata* rhabdovirus  
468 (Simmonds et al., 2016). Given the antecedent of the parasitic wasp *Dinocampus coccinellae* (Dheilly  
469 et al., 2015) it is tempting to suggest that the accumulation of virus in venom glands in *D. longicaudata*  
470 could be associated with the parasitic process. In *N. clavipes* the evolutionary implications of virus  
471 accumulation in venom glands is unclear. It would be interesting to explore if there could be some  
472 association with virus presence and predatory behavior or outcome. In addition, when whole spiders  
473 were sampled, the detected viruses were found to be at lower RNA levels than in the specific



474 silk/venom/brain libraries (Figure 2.E-F). Although in the context of a small sample size and the fact  
475 that the whole body libraries derive from different sampled individuals than the tissue libraries, I  
476 cautiously speculate that perhaps these specific sampled tissues are enriched on RNA virus loads. More  
477 complex distribution/presence absence patterns are available in Supp. Figure 21 and Supp. Table 11.

#### 478 **4 Conclusions**

479 Regardless of sample size, and the limited number of detected viruses, it is interesting to  
480 highlight that most detected sequences corresponded to new unreported virus species. Spiders could be  
481 an important reservoir of viral genetic diversity that ought to be assessed. Widespread consistent RNA  
482 accumulation of diverse putative viruses on independent profiled samples, sequence structure and  
483 domain architecture, supports the assumption that the identified sequences correspond to *bona fide*  
484 viruses. It is not easy to speculate about the biological significance of the presence, accumulation, and  
485 distribution of these potential viruses in the context of limited literature. The brain enrichment of RNA  
486 virus loads appears not to be incidental, and could be associated to a potential effect on the spider host.  
487 The accumulation of viral RNA on silk and venom glands may have some evolutionary relation with  
488 virus horizontal transfer. Future studies should focus not only on complementing and expanding these  
489 findings, but also on addressing the potential ecological role of these viruses, which might influence  
490 the biology of these outstanding arthropod species.

#### 491 **5 Data availability**

492 *Nephila clavipes* associated virus sequences have been deposited in NCBI GenBank (Accession  
493 numbers MF348194 to MF348204). Data from Babb et al (2017) are available through the central  
494 BioProject database at NCBI under project accession PRJNA356433 and BioSamples accessions  
495 SAMN06132062–SAMN06132080. All short-read sequencing data are deposited in the NCBI Short  
496 Read Archive (SRX2458083–SRX2458130), and transcriptome data are available at the Transcriptome  
497 Shotgun Assembly (TSA) under accession GFKT00000000.

#### 498 **6 Conflict of Interest**

499 The author declares that the research was conducted in the absence of any commercial or  
500 financial relationships that could be construed as a potential conflict of interest.

#### 501 **7 Author Contributions**

502 HJD designed the study, conducted all bioinformatics analysis, interpreted the data, wrote and  
503 approved the final manuscript.

## 504 **8 Acknowledgments**

505 I would like to express sincere thanks to Dr. Benjamin Voight for his encouragement in  
506 communicating these findings, which are only possible thanks to the remarkable work of his team and  
507 colleagues. Additional thanks to Dr. Casey Greene and colleagues for taking from words to action the  
508 active support and promotion of secondary analysis of data, which could redound in new discoveries  
509 and hypotheses, and a paradigm shift in research practices. Special thanks to Dr. Max L. Nibert for  
510 helpful discussions and insightful comments.

## 511 **9 References**

512 -Agnarsson, I., Kuntner, M. & Blackledge, T.A. (2010). Bioprospecting finds the toughest biological  
513 material: extraordinary silk from a giant riverine orb spider. *PLoS ONE*, 5, e11234.

514 -Attoui, H., Billoir, F., Biagini, P., de Micco, P., & de Lamballerie, X. (2000). Complete sequence  
515 determination and genetic analysis of Banna virus and Kadipiro virus: proposal for assignment  
516 to a new genus (Seadornavirus) within the family Reoviridae. *Journal of General*  
517 *Virology*, 81(6), 1507-1515.

518 -Babb, P. L., Lahens, N. F., Correa-Garhwal, S. M., Nicholson, D. N., Kim, E. J., Hogenesch, J. B., ...  
519 & Voight, B. F. (2017). The *Nephila clavipes* genome highlights the diversity of spider silk genes  
520 and their complex expression. *Nature Genetics*, doi:10.1038/ng.3852

521 -Barr, J. N., & Wertz, G. W. (2004). Bunyamwera bunyavirus RNA synthesis requires cooperation of  
522 3'-and 5'-terminal sequences. *Journal of virology*, 78(3), 1129-1138.

523 -Blair, C. D. (2011). Mosquito RNAi is the major innate immune pathway controlling arbovirus  
524 infection and transmission. *Future microbiology*, 6(3), 265-277.

525 -Carson, M. J., Doose, J. M., Melchior, B., Schmid, C. D., & Ploix, C. C. (2006). CNS immune  
526 privilege: hiding in plain sight. *Immunological reviews*, 213(1), 48-65.

527 -Darzentas, N. (2010). Circoletto: visualizing sequence similarity with Circos. *Bioinformatics*, 26 :  
528 2620-2621.

- 529 -Dheilly, N. M., Maure, F., Ravallec, M., Galinier, R., Doyon, J., Duval, D., Leger, L., Volkoff, A.N.,  
530 Missé, D., Nidelet, S., Demolombe, V. (2015) Who is the puppet master? Replication of a  
531 parasitic wasp-associated virus correlates with host behaviour manipulation. *Proceedings of the*  
532 *Royal Society of London B: Biological Sciences*, 282: 20142773.
- 533 -Espinosa-Hernández, W., Velez-Uriza, D., Valdés, J., Vélez-Del Valle, C., Salas-Benito, J., Martínez-  
534 Contreras, R., ... & De Nova-Ocampo, M. (2014). PTB Binds to the 3'Untranslated Region of  
535 the Human Astrovirus Type 8: A Possible Role in Viral Replication. *PloS one*, 9(11), e113113.
- 536 -Galiana-Arnoux, D., Dostert, C., Schneemann, A., Hoffmann, J. A., & Imler, J. L. (2006). Essential  
537 function in vivo for Dicer-2 in host defense against RNA viruses in drosophila. *Nature*  
538 *immunology*, 7(6), 590.
- 539 -Garrison, N. L., Rodriguez, J., Agnarsson, I., Coddington, J. A., Griswold, C. E., Hamilton, C. A., ...  
540 & Bond, J. E. (2016). Spider phylogenomics: untangling the Spider Tree of Life. *PeerJ*, 4, e1719.
- 541 -Gerlach, P., Malet, H., Cusack, S., & Reguera, J. (2015). Structural insights into bunyavirus replication  
542 and its regulation by the vRNA promoter. *Cell*, 161(6), 1267-1279.
- 543 -Ghosh, R. C., Ball, B. V., Willcocks, M. M., & Carter, M. J. (1999). The nucleotide sequence of  
544 sacbrood virus of the honey bee: an insect picorna-like virus. *Journal of General Virology*,  
545 80:1541-1549.
- 546 -Govan, V. A., Leat, N., Allsopp, M., & Davison, S. (2000). Analysis of the complete genome sequence  
547 of acute bee paralysis virus shows that it belongs to the novel group of insect-infecting RNA  
548 viruses. *Virology*, 277: 457-463.
- 549 -Han, Y., van Oers, M.M., van Houte, S., Ros, V.I.D. (2015). Virus-Induced Behavioural Changes  
550 in Insects. In: Mehlhorn H. (eds) Host Manipulations by Parasites and Viruses. *Parasitology*  
551 *Research Monographs*, vol 7. Springer, Cham.
- 552 -Higgins, L. (2000). The interaction of season length and development time alters size at maturity.  
553 *Oecologia*, 122:51–59.
- 554 -Higgins, L. E. & Buskirk, R. E. (1992). A trap-building predator exhibits different tactics for  
555 different aspects of foraging behaviour. *Animal Behaviour*, 44:485–499.



- 556 -Jaafar, F. M., Attoui, H., Bahar, M. W., Siebold, C., Sutton, G., Mertens, P. P., ... & De Lamballerie,  
557 X. (2005). The structure and function of the outer coat protein VP9 of Banna  
558 virus. *Structure*, 13(1), 17-28.
- 559 -Kaplan, D.L., Adams, W.W., Viney, C., Farmer, B.L., (1993) Silk Polymers: Materials Science and  
560 Biotechnology. American Chemical Society Books, Washington.
- 561 -King, A. M., Lefkowitz, E., Adams, M. J., & Carstens, E. B. (Eds.). (2011). *Virus taxonomy: ninth*  
562 *report of the International Committee on Taxonomy of Viruses*. Elsevier.
- 563 -Kukkonen, S. K., Vaehri, A., & Plyusnin, A. (2005). L protein, the RNA-dependent RNA polymerase  
564 of hantaviruses. *Archives of virology*, 150(3), 533-556.
- 565 -Kuntner, M. & Coddington, J. A. (2009). Discovery of the largest orbweaving spider species: the  
566 evolution of gigantism in *Nephila*. *PLoS ONE*, 4, e7516.
- 567 -Le Gall, O., Christian, P., Fauquet, C. M., King, A. M., Knowles, N. J., Nakashima, N., ... &  
568 Gorbalenya, A. E. (2008). Picornavirales, a proposed order of positive-sense single-stranded  
569 RNA viruses with a pseudo-T=3 virion architecture. *Archives of virology*, 153: 715.
- 570 -Lewis, T. L., & Matsui, S. M. (1995). An astrovirus frameshift signal induces ribosomal frameshifting  
571 in vitro. *Archives of virology*, 140(6), 1127-1135.
- 572 -Li, C. X., Shi, M., Tian, J. H., Lin, X. D., Kang, Y. J., Chen, L. J., ... & Zhang, Y. Z. (2015).  
573 Unprecedented genomic diversity of RNA viruses in arthropods reveals the ancestry of negative-  
574 sense RNA viruses. *Elife*, 4, e05378.
- 575 -Monroe, S. S., Jiang, B.A., Stine, S.E., Koopmans, M.A. & Glass, R. I. (1993). Subgenomic RNA  
576 sequence of human astrovirus supports classification of Astroviridae as a new family of RNA  
577 viruses. *Journal of virology*, 67(6), 3611-3614.
- 578 -Olivier, V., Blanchard, P., Chaouch, S., Lallemand, P., Schurr, F., Celle, O., ... & Ribière, M. (2008).  
579 Molecular characterisation and phylogenetic analysis of Chronic bee paralysis virus, a honey bee  
580 virus. *Virus research*, 132: 59-68.
- 581 -Pilipenko, E. V., Blinov, V. M., Romanova, L. I., Sinyakov, A. N., Maslova, S. V., & Agol, V. I.  
582 (1989). Conserved structural domains in the 5'-untranslated region of picornaviral genomes: an  
583 analysis of the segment controlling translation and neurovirulence. *Virology*, 168(2), 201-209.

- 584 -Pilipenko, E. V., Gmyl, A. P., Maslova, S. V., Belov, G. A., Sinyakov, A. N., Huang, M., ... & Agol,  
585 V. I. (1994). Starting window, a distinct element in the cap-independent internal initiation of  
586 translation on picornaviral RNA. *Journal of molecular biology*, 241(3), 398-414.
- 587 -Reguera, J., Weber, F., & Cusack, S. (2010). Bunyaviridae RNA polymerases (L-protein) have an N-  
588 terminal, influenza-like endonuclease domain, essential for viral cap-dependent  
589 transcription. *PLoS pathogens*, 6(9), e1001101.
- 590 -Salazar, M. I., Richardson, J. H., Sánchez-Vargas, I., Olson, K. E., & Beaty, B. J. (2007). Dengue  
591 virus type 2: replication and tropisms in orally infected *Aedes aegypti* mosquitoes. *BMC*  
592 *microbiology*, 7(1), 9.
- 593 -Shean, R. C., Makhsous, N., Crawford, R. L., Jerome, K. R., & Greninger, A.L. (2017). Draft Genome  
594 Sequences of Six Novel Picorna-Like Viruses from Washington State Spiders. *Genome*  
595 *announcements*, 5(9), e01705-16.
- 596 -Shi, M., Lin, X. D., Tian, J. H., Chen, L. J., Chen, X., Li, C. X., ... & Zhang, Y.Z. (2016). Redefining  
597 the invertebrate RNA virosphere. *Nature*, 540:539-543.
- 598 -Simmonds, T.J., Carrillo, D., Burke, G.R. (2016). Characterization of a venom gland-associated  
599 rhabdovirus in the parasitoid wasp *Diachasmimorpha longicaudata*. *Journal of insect physiology*,  
600 91: 48-55.
- 601 -Stilling, R.M., Dinan, T.G., Cryan, J.F. (2016). The brain's Geppetto—microbes as puppeteers of  
602 neural function and behaviour?. *Journal of Neurovirology*, 22: 14-21.
- 603 -Taylor, D. J., Krishna, N. K., Canady, M. A., Schneemann, A., & Johnson, J. E. (2002). Large-scale,  
604 pH-dependent, quaternary structure changes in an RNA virus capsid are reversible in the absence  
605 of subunit autoproteolysis. *Journal of virology*, 76(19), 9972-9980.
- 606 -Tsiang, H., Koulakoff, A., Bizzini, B., & Berwald-Netter, Y. (1983). Neurotropism of rabies virus: an  
607 in vitro study. *Journal of Neuropathology & Experimental Neurology*, 42(4), 439-452.
- 608 -Vollrath, F. (2000). Strength and structure of spiders' silks. *Reviews in Molecular*  
609 *Biotechnology*, 74:67-83.
- 610 -Webster, C. L., Waldron, F. M., Robertson, S., Crowson, D., Ferrari, G., Quintana, J. F., ... & Lazzaro,  
611 B. P. (2015). The discovery, distribution, and evolution of viruses associated with *Drosophila*  
612 *melanogaster*. *PLoS biology*, 13(7), e1002210.

613 -Williamson, C., Rybicki, E.P., Kasdorf, G.G., Von Wechmar, M.B. (1988). Characterization of a new  
614 picorna-like virus isolated from aphids. *Journal of General Virology*, 69: 787–795.

615

## 616 10 Figure legends

617

618 **Figure 1.** *Nephila clavipes* *Picornavirales* like viruses **A)** Genome graphs depicting genomes and  
619 predicted gene products of *N. clavipes* picorna-like viruses. Pfam, PROSITE and Superfamily  
620 predicted domains ( $E\text{-value} \leq 1e\text{-5}$ ) are shown in purple, bordeaux and green, respectively. Predicted  
621 domain data is available in Supp. Table 1-4. **B)** NcPV1-3 long A+U rich 5' untranslated regions,  
622 presenting several UUUA motifs (loop) found typically in *Picornavirales*. Percentage of GC and AU  
623 content are expressed in blue and green line graphs, respectively. **C)** Similarity levels of NcPV  
624 replicases expressed as Circoletto diagrams based on BLASTP searches with an E-value of  $1e\text{-1}$   
625 threshold. RPs are depicted clockwise, and sequence similarity is visualized from blue to red ribbons  
626 representing low-to-high sequence identity. **D)** NcPV1-3 secondary structure of 5' UTR, a RNA  
627 element predicted to function as internal ribosome entry site (IRES), allowing translation initiation in  
628 a cap-independent manner, as part of protein synthesis. **E)** Maximum likelihood unrooted branched  
629 phylogenetic tree based in MAFFT alignments of predicted replicase proteins of *Nephila clavipes*  
630 picorna-like viruses (black stars) and related viruses. Families of viruses of the *Picornavirales* order  
631 are indicated by colors. Scale bar represents substitutions per site. **F)** Rooted layout of the preceding  
632 phylogenetic tree. Magnifications of relevant regions of the tree are presented on the right and indicated  
633 by puzzle pieces. Reported hosts of viruses are represented by silhouettes. Branch labels represent  
634 FastTree support values. Complete tree showing tip species, host and virus assigned taxonomy labels  
635 are available as (Supp. Fig. 1-3). Abbreviations: NcPV1-4, *Nephila clavipes* picorna-like virus 1-4.

636 **Figure 2.** *Nephila clavipes* *Virgaviridae* like viruses **A)** Genome graphs depicting genomes and  
637 predicted gene products of *N. clavipes* virga-like viruses (NcVV1-2) and *N. clavipes* strains of Hubei  
638 virga-like virus 11 (Hv111 (Ncs)) and *N. clavipes* associated strain of *Remania mosaic virus* RMV  
639 (Ncas)). Pfam, PROSITE, GENE3D, SignalP and Superfamily predicted domains ( $E\text{-value} \leq 1e\text{-5}$ ) are  
640 shown in purple, Bordeaux, pink, orange and green, respectively. Predicted domain data is available in  
641 Supp. Table 5-8. Abbreviations: WFV6-Ncs, *N. clavipes* strain of Wuhan fly virus 6; Hv111-Ncs, *N.*  
642 *clavipes* strain of Hubei virga-like virus 11; RMV-Ncas, *N. clavipes* associated strain of *Remania*

643 *mosaic virus*. **B)** Maximum likelihood unrooted branched phylogenetic tree based in MAFFT  
644 alignments of predicted replicase proteins of *Nephila clavipes* virga-like viruses (black stars) and  
645 related viruses. Genera of viruses of the *Virgaviridae* family are indicated by colors. Scale bar  
646 represents substitutions per site. **C)** Rooted layout of the preceding phylogenetic tree. Magnifications  
647 of relevant regions of the tree are presented on the right and indicated by puzzle pieces. Reported hosts  
648 of viruses are represented by silhouettes. † represent mosquitoes and ¥ flies. Branch labels represent  
649 FastTree support values. Complete tree showing tip species, host and virus assigned taxonomy labels  
650 are available as (Supp. Fig. 4-6).

651 **Figure 3.** *Nephila clavipes* *Bunyvirales* like virus **A)** Genome graphs depicting genome segments and  
652 predicted gene products of *N. clavipes* bunya-like virus (NcBV). Pfam, PROSITE, GENE3D, and  
653 SignalP predicted domains (E-value  $\leq 1e-5$ ) are shown in purple, Bordeaux, pink and orange,  
654 respectively. Predicted domain data is available in Supp. Table 9. **B)** MAFFT alignment of L replicase  
655 protein of NcBV and type members of *Bunyvirales* families. Abbreviations: *Hantaan orthohantavirus*  
656 (*Hantaviridae* - HANV), *European mountain ash ringspot-associated emaravirus* (*Fimoviridae* -  
657 EMARA), *Ferak orthoferavirus* (*Feraviridae* - FV), *Jonchet orthojonvirus* (*Jonviridae* - JV), *Dugbe*  
658 *orthonairovirus* (*Nairoviridae* - DONV), *Bunyamwera orthobunyavirus* (*Peribunyaviridae* -  
659 BUNYAV), *Kigluaik phantom orthophasmavirus* (*Phasmaviridae* - KPOPV), *Rift Valley fever*  
660 *phlebovirus* (*Phenuiviridae* - FVFB), *Tomato spotted wilt orthotospovirus* (*Tospoviridae* - TSWV).  
661 **C)** Sequence alignment of vRNA and vcRNA termini of NcBV genome segments L and G. Secondary  
662 structure prediction of RNA base pairing between the genome segment ends of NcBV, forming a  
663 double-stranded “panhandle” structure. NcBV L and G vRNAs present highly complementary genome  
664 termini, extending over 30 nt. Ensemble free energy of G and L vRNAs termini heterodimer expressed  
665 as dot plot. **D)** Maximum likelihood unrooted branched phylogenetic tree based in MAFFT alignments  
666 of predicted L replicase protein of *Nephila clavipes* bunya-like virus (black stars) and related viruses.  
667 Family of viruses of the *Bunyvirales* order are indicated by colors. Scale bar represents substitutions  
668 per site. **E)** Rooted layout of the preceding phylogenetic tree. Magnifications of relevant regions of the  
669 tree are presented below and indicated by puzzle pieces. Reported hosts of viruses are represented by  
670 silhouettes. Branch labels represent FastTree support values. Complete tree showing tip species, host  
671 and virus assigned taxonomy labels are available as (Supp. Fig. 7-9).

672 **Figure 4.** *Nephila clavipes* *Reoviridae* like viruses **A)** Genome graphs depicting genome and predicted  
673 gene products of *N. clavipes* reo-like virus 1 and 2 (NcRV1-2). Pfam and Superfamily predicted  
674 domains (E-value  $\leq 1e-5$ ) are shown in Bordeaux and green, respectively. Sequence regions presenting

675 similarity with structural signatures are expressed in grey. **B)** Maximum likelihood rooted phylogenetic  
676 tree based in MAFFT alignments of predicted L replicase protein of *Nephila clavipes* reo-like viruses  
677 (black stars) and related viruses. Genera of viruses of the *Reoviridae* family are indicated by colors.  
678 Scale bar represents substitutions per site. **C)** Unrooted layout of the preceding phylogenetic tree.  
679 Magnifications of relevant regions of the tree are presented above and indicated by puzzle pieces.  
680 Reported hosts of viruses are represented by silhouettes. Branch labels represent FastTree support  
681 values. Complete tree showing tip species, host and virus assigned taxonomy labels are available as  
682 (Supp. Fig. 10-12).

683 **Figure 5.** *Nephila clavipes* *Astroviridae* like virus **A)** Genome graphs depicting genome and predicted  
684 gene products of *N. clavipes* astro-like virus (NcAV). Pfam, PROSITE and Superfamily predicted  
685 domains (E-value  $\leq 1e-5$ ) are shown in purple, bordeaux and green, respectively. Functional domains  
686 determined by HHPRED are indicated in dark green. Predicted domain data is available in Supp. Table  
687 10. **B)** NcAV predicted -1 ribosomal frameshifting is induced by a heptanucleotide “slippery sequence”  
688 of the form U\_UUU\_UUA, identical to the form of HIV1 (*Retroviridae*; *Lentivirus*) and *Sindbis virus*  
689 (*Togaviridae*; *Alphavirus*), followed downstream by a highly stable RNA H-type pseudoknot structural  
690 element. **C)** NcAV presents a highly stable triple stem loop predicted RNA structure at its 3’ termini.  
691 Stem I of NcAV presents at an equilocal region a UCUU motif (black star) which in *Human astrovirus*  
692  $\delta$  mediates PTB binding to the 3’ UTR, required for Astrovirus replication. **D)** MAFFT alignment of  
693 the capsid like protein of NcAV and related *Astroviridae*, *Alphatetraviridae* and unclassified astro-like  
694 viruses. Maturation of the capsid in alphatetraviruses is mediated by an autoproteolytic cleavage  
695 dependent of the presence of an Asn-570, which is at the cleavage site, and is present in NcAV and  
696 *Alphatetraviridae* and unclassified astro-like viruses, but not in *Astroviridae* viruses. Abbreviations:  
697 Beihai astro-like virus (BALV), *Human astrovirus* (HAV), *Dendrolimus punctatus tetravirus* (DpTV),  
698 *Nudaurelia capensis omega virus* (NucOV), *Helicoverpa armigera stunt virus* (HaSV), Hubei astro-like  
699 virus (HALV), Hubei leech virus 1 (HLV1). **E)** Maximum likelihood unrooted branched phylogenetic  
700 tree based in MAFFT alignments of predicted RP protein, or Capsid protein **(F)** of *Nephila clavipes*  
701 astro-like virus (black stars) and related viruses. Genera of viruses of the *Astroviridae* family and  
702 related virus families are indicated by colors. Scale bar represents substitutions per site. Rooted layout  
703 of the preceding phylogenetic trees are also presented. Reported hosts of viruses are represented by  
704 silhouettes. Branch labels represent FastTree support values. Complete tree showing tip species, host  
705 and virus assigned taxonomy labels are available as (Supp. Fig. 13-15).

706



707 **Figure 6.** Graphs bars and heatmap describing virus RNA transcript levels assayed in two whole body  
 708 spider samples, ten individual silk glands, two venom glands, and two brain isolates collected from  
 709 four females, Nep-5, Nep-7, Nep-8 and Nep-009. Values are expressed as FPKM, where M indicates  
 710 million of non-rRNA host transcriptome reads that map to the host genome assembly NepCla1.0 in  
 711 **B, C, D, F and G**, and as total virus derived million nt in **A**, or non-rRNA host transcriptome percentage  
 712 reads that map to viruses in **E**. FPKM Values corresponding to each sample are available as Supp.  
 713 Table 11.

714

715 **Table 1.** *Nephila clavipes* viruses, genome composition, similarity to reported viruses and proposed  
 716 names.

717

| GenBank id # | Gen size | RP    | Best hit                       | Bitscore | Query C | E-value  | Identity | Proposed name                                  |
|--------------|----------|-------|--------------------------------|----------|---------|----------|----------|------------------------------------------------|
| MF348195     | 10198    | 3128  | Wuhan spider virus 2           | 2175     | 97%     | 0.0      | 40%      | <i>Nephila clavipes</i> picorna-like virus 1   |
| MF348196     | 11699    | 2412  | Wuhan spider virus 6           | 462      | 72%     | 4,00E-73 | 36%      | <i>Nephila clavipes</i> picorna-like virus 2   |
| MF356203     | 9141     | 2744  | Washington bat picornavirus    | 2399     | 90%     | 0.0      | 48%      | <i>Nephila clavipes</i> picorna-like virus 3   |
| MF356207     | 11237    | 2533  | Hubei picorna-like virus 71    | 1381     | 87%     | 0.0      | 35%      | <i>Nephila clavipes</i> picorna-like virus 4   |
| MF348197     | 10569    | 2266  | Lodeiro virus                  | 836      | 97%     | 0.0      | 29%      | <i>Nephila clavipes</i> virga-like virus 1     |
| MF348198     | 11919    | 2917  | Shayang virga-like virus       | 1130     | 64%     | 0.0      | 34%      | <i>Nephila clavipes</i> virga-like virus 2     |
| MF348199     | 7365     | 2409  | Andes orthohantavirus          | 112      | 35%     | 8,00E-21 | 22%      | <i>Nephila clavipes</i> bunya-like virus RNA L |
| MF356206     | 4633     | 1465* | Shayang Spider Virus 1         | 236      | 43%     | 1,00E-44 | 24%      | <i>Nephila clavipes</i> bunya-like virus RNA M |
| MF348200     | 4060     | 1331  | <i>H. vitripennis</i> reovirus | 129      | 70%     | 3,00E-26 | 23%      | <i>Nephila clavipes</i> reo-like virus 1 RNA 1 |
| MF348201     | 2617     | 831*  | Hubei reo-like virus 11        | 104      | 50%     | 2,00E-05 | 24%      | <i>Nephila clavipes</i> reo-like virus 1 RNA 2 |
| MF356204     | 4302     | 1410* | Hubei odonate virus 14         | 42       | 11%     | 6.7      | 23%      | <i>Nephila clavipes</i> reo-like virus 1 RNA 3 |
| MF356205     | 1232     | 365*  | <i>Banna virus</i>             | 30       | 16%     | 5,96E-02 | 26%      | <i>Nephila clavipes</i> reo-like virus 1 RNA 4 |
| MF356208     | 3786     | 1237  | Bloomfield virus               | 1487     | 99%     | 0.0      | 61%      | <i>Nephila clavipes</i> reo-like virus 2 RNA 1 |
| MF356209     | 3837     | 1237* | Bloomfield virus               | 1455     | 99%     | 0.0      | 55%      | <i>Nephila clavipes</i> reo-like virus 2 RNA 2 |
| MF356210     | 2985     | 1230* | Bloomfield virus               | 696      | 99%     | 0.0      | 39%      | <i>Nephila clavipes</i> reo-like virus 2 RNA 3 |
| MF356211     | 2628     | 970*  | Bloomfield virus               | 510      | 97%     | 6.0E-165 | 37%      | <i>Nephila clavipes</i> reo-like virus 2 RNA 4 |
| MF356212     | 2243     | 796*  | Bloomfield virus               | 656      | 91%     | 0.0      | 49%      | <i>Nephila clavipes</i> reo-like virus 2 RNA 5 |
| MF356213     | 1616     | 707*  | Bloomfield virus               | 604      | 91%     | 1.0E-143 | 74%      | <i>Nephila clavipes</i> reo-like virus 2 RNA 6 |
| MF356214     | 1856     | 453*  | Bloomfield virus               | 192      | 91%     | 8.00E-51 | 30%      | <i>Nephila clavipes</i> reo-like virus 2 RNA 7 |
| MF356215     | 1267     | 566*  | Bloomfield virus               | 284      | 89%     | 3.00E-90 | 44%      | <i>Nephila clavipes</i> reo-like virus 2 RNA 8 |
| MF356216     | 1096     | 364*  | Bloomfield virus               | 145      | 99%     | 5.00E-38 | 30%      | <i>Nephila clavipes</i> reo-like virus 2 RNA 9 |

|          |       |                   |                               |      |      |          |      |                                                                   |
|----------|-------|-------------------|-------------------------------|------|------|----------|------|-------------------------------------------------------------------|
| MF356217 | 2339  | 306*              | Hubei odonate virus 14        | 289  | 95%  | 6.00E-37 | 29%  | <i>Nephila clavipes</i> reo-like virus 2 RNA 10                   |
| MF356202 | 7535  | 547*              | Hubei leech virus 1           | 92   | 49%  | 2,00E-16 | 29%  | <i>Nephila clavipes</i> astro-like virus                          |
| MF348203 | 1465  | 470               | Wuhan fly virus 6             | 983  | 100% | 0.0      | 100% | Wuhan fly virus 6 ( <i>N. clavipes</i> strain) RNA 1              |
| MF348204 | 1410  | 416 <sup>a</sup>  | Wuhan insect virus 23         | 69.7 | 65%  | 4,00E-11 | 22%  | Wuhan fly virus 6 ( <i>N. clavipes</i> strain) RNA 2 <sup>b</sup> |
| MF348194 | 10433 | 2481 <sup>c</sup> | Hubei virga-like virus 11     | 2189 | 42%  | 0.0      | 99%  | Hubei virga-like virus 11 ( <i>N. clavipes</i> strain)            |
| MF348202 | 6367  | 1615              | <i>Rehmannia mosaic virus</i> | 1161 | 96%  | 0.0      | 97%  | <i>Rehmannia mosaic virus</i> ( <i>N. clavipes</i> ass. strain)   |

718

719 Abbreviations: Gen size, RNA predicted genome size in nucleotides; RP gene product size in aa  
 720 corresponding to predicted replicase proteins. Best hit, closest hit on NCBI BLASTP searches with  
 721 predicted gene product against the non-redundant protein database NR; Query C, query coverage. <sup>a</sup>  
 722 corresponds to the predicted (unreported) coat protein gene product of WFV6-Ncs. <sup>b</sup> This genome  
 723 segment has not been described in the literature. <sup>c</sup> The refseq accession NC\_033082.1 is a truncated  
 724 6,206 nt long partial sequence of HviV11. The gene products followed by an \* represent non-replicase  
 725 predicted proteins.

Figure 1.TIF

bioRxiv preprint doi: <https://doi.org/10.1101/140814>; this version posted October 13, 2017. The copyright holder for this preprint (which was not certified by peer review) is the author/funder, who has granted bioRxiv a license to display the preprint in perpetuity. It is made available under aCC-BY-NC-ND 4.0 International license.

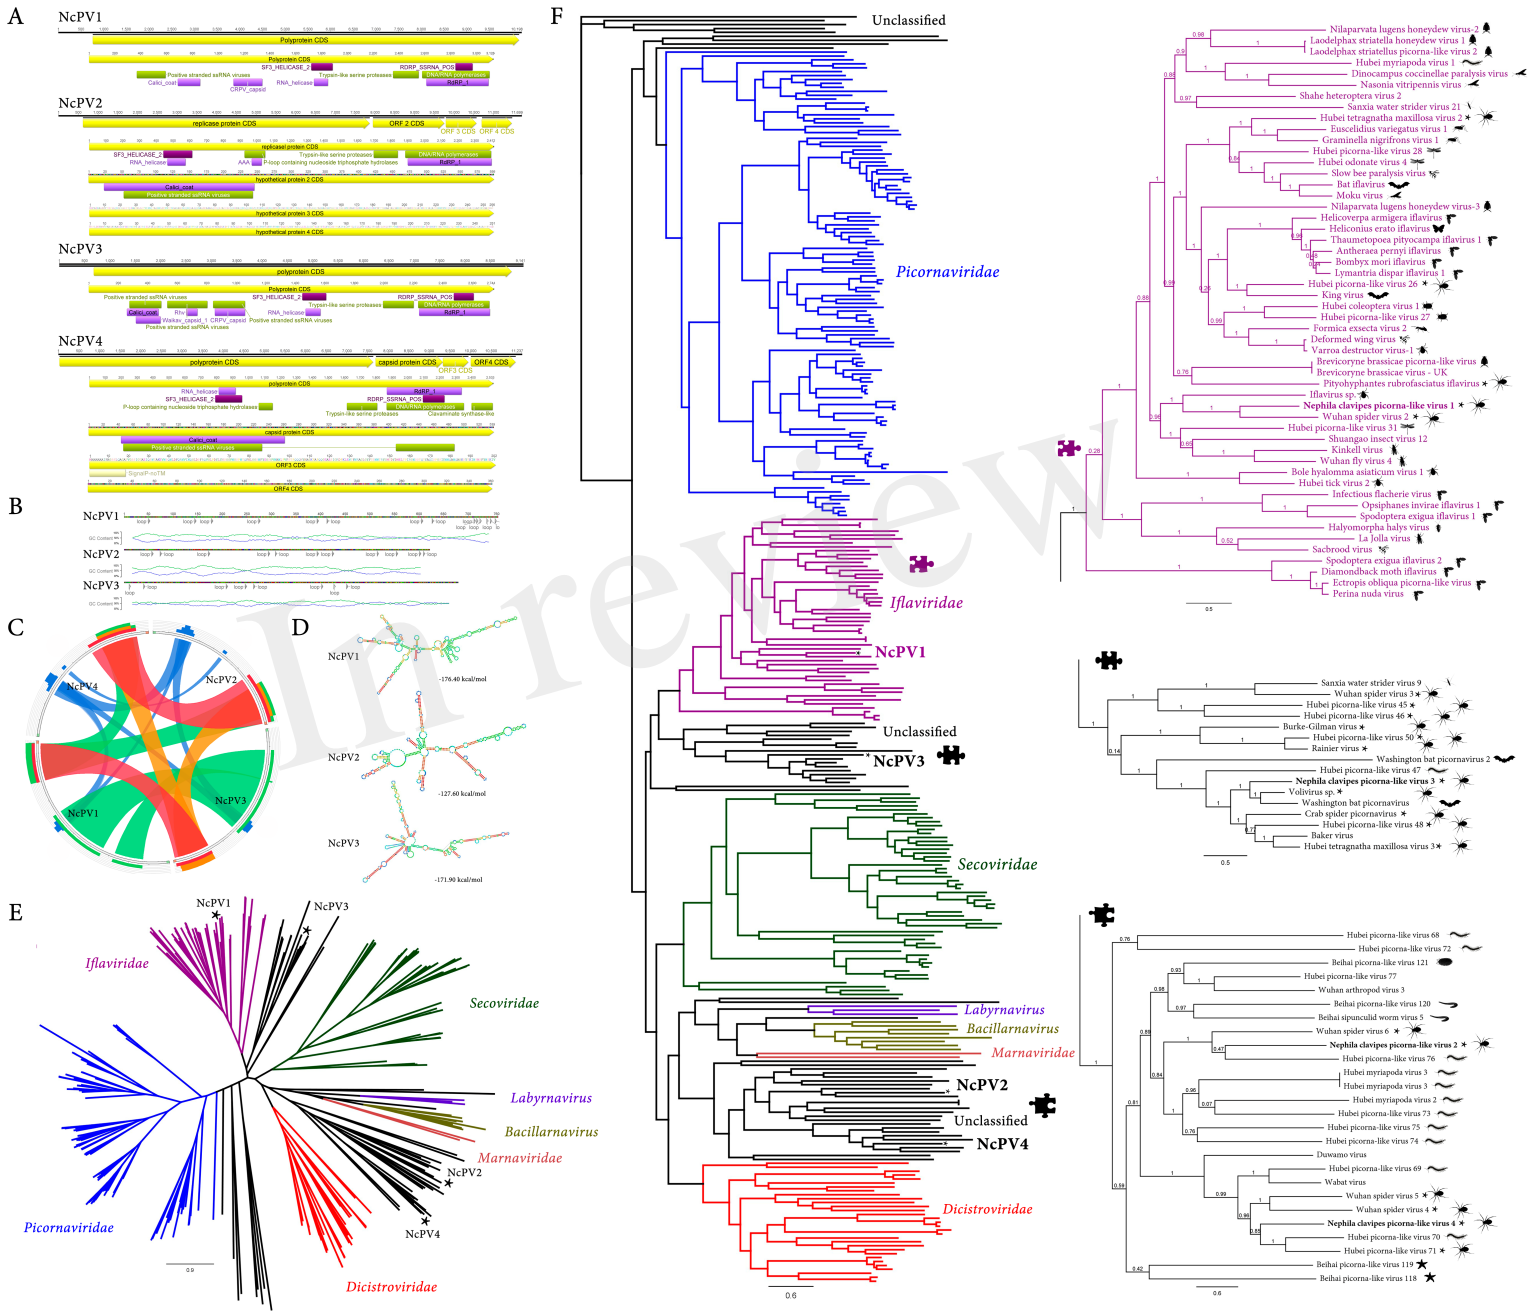



Figure 2.TIF

bioRxiv preprint doi: <https://doi.org/10.1101/140814>; this version posted October 13, 2017. The copyright holder for this preprint (which was not certified by peer review) is the author/funder, who has granted bioRxiv a license to display the preprint in perpetuity. It is made available under aCC-BY-NC-ND 4.0 International license.

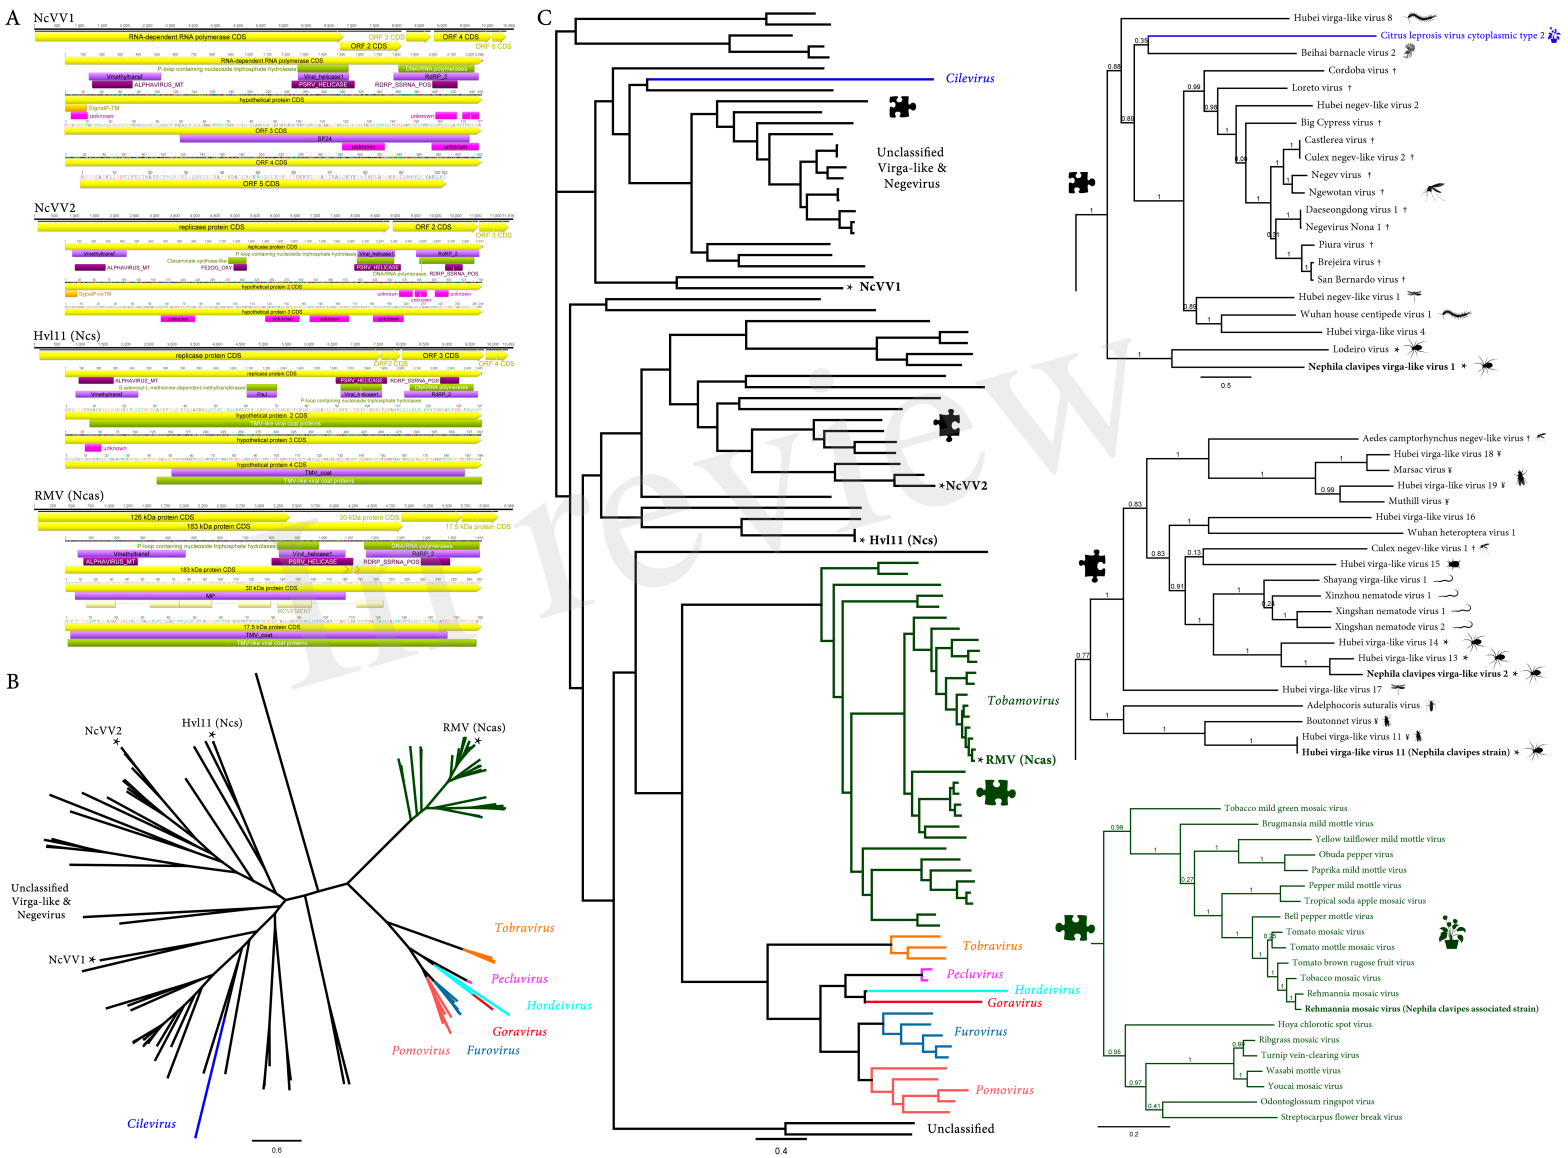

Figure 3.TIF

bioRxiv preprint doi: <https://doi.org/10.1101/140814>; this version posted October 13, 2017. The copyright holder for this preprint (which was not certified by peer review) is the author/funder, who has granted bioRxiv a license to display the preprint in perpetuity. It is made available under aCC-BY-NC-ND 4.0 International license.

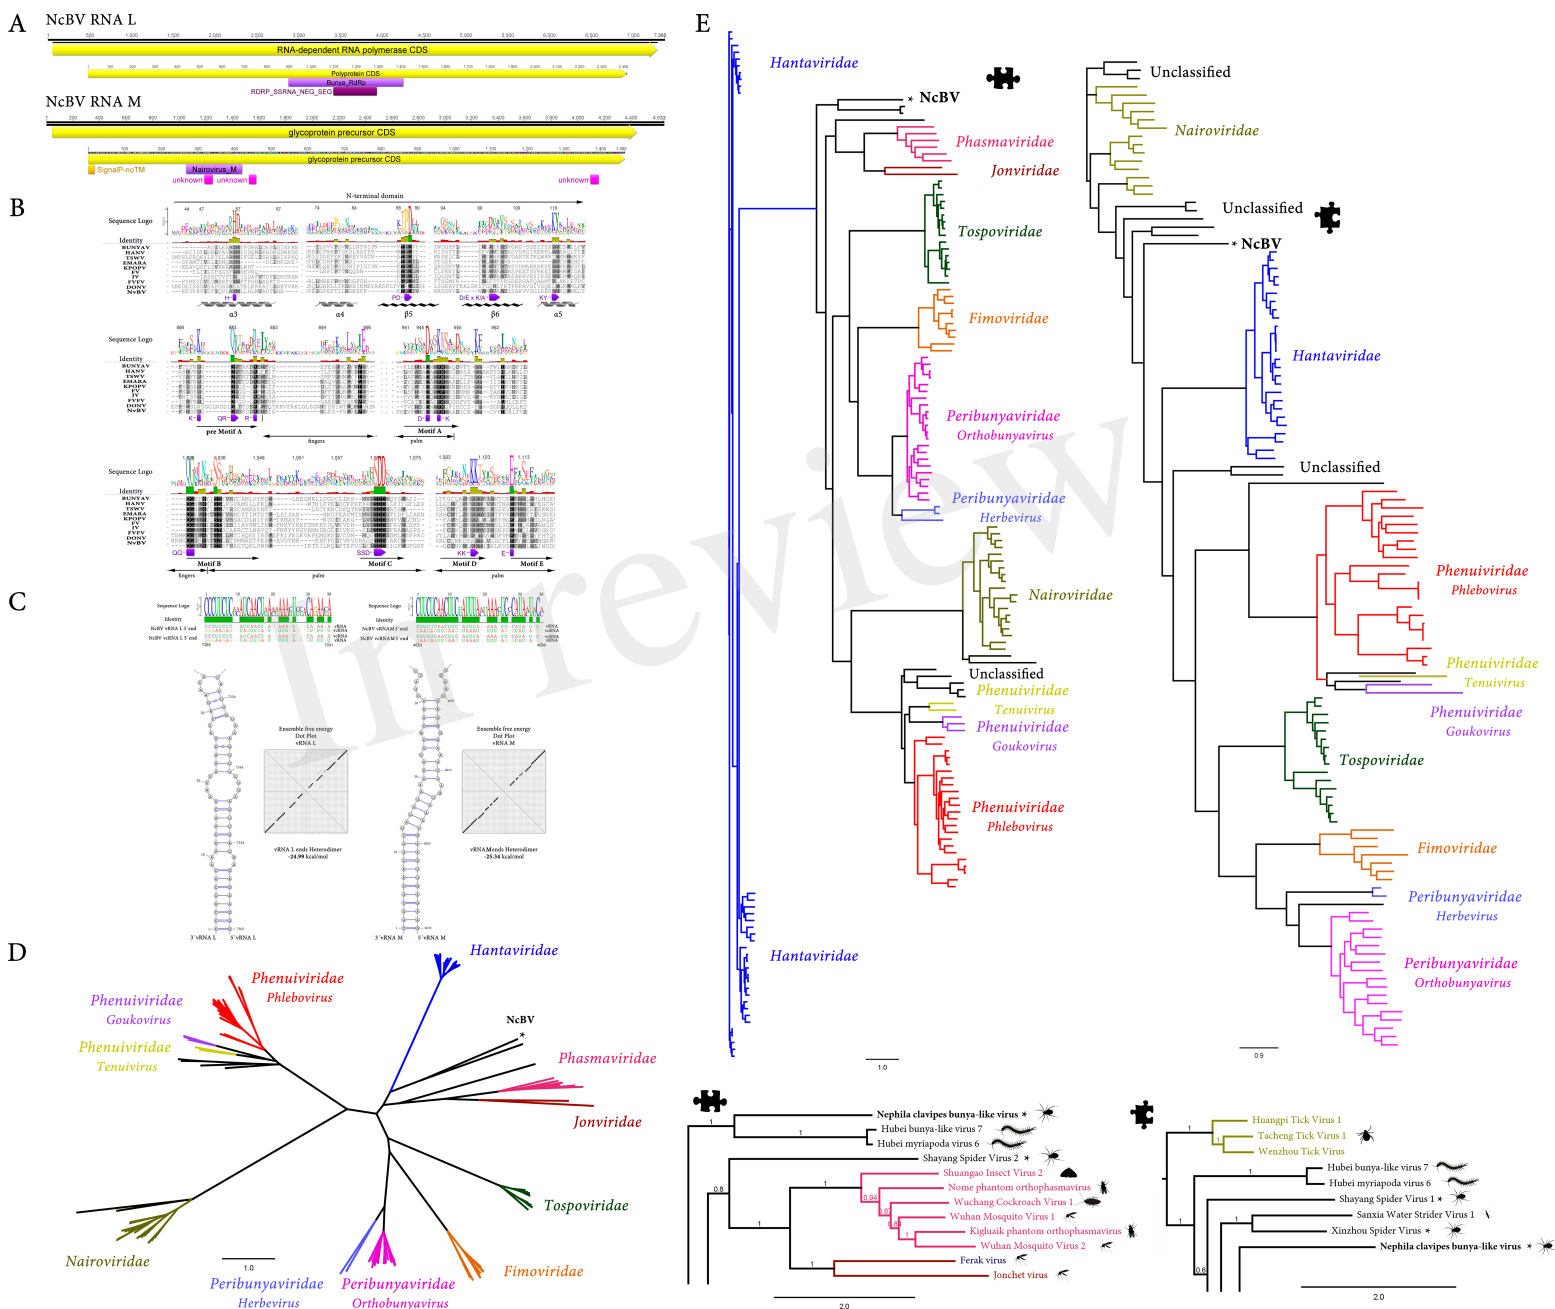

Figure 4.TIF

bioRxiv preprint doi: <https://doi.org/10.1101/140814>; this version posted October 13, 2017. The copyright holder for this preprint (which was not certified by peer review) is the author/funder, who has granted bioRxiv a license to display the preprint in perpetuity. It is made available under aCC-BY-NC-ND 4.0 International license.

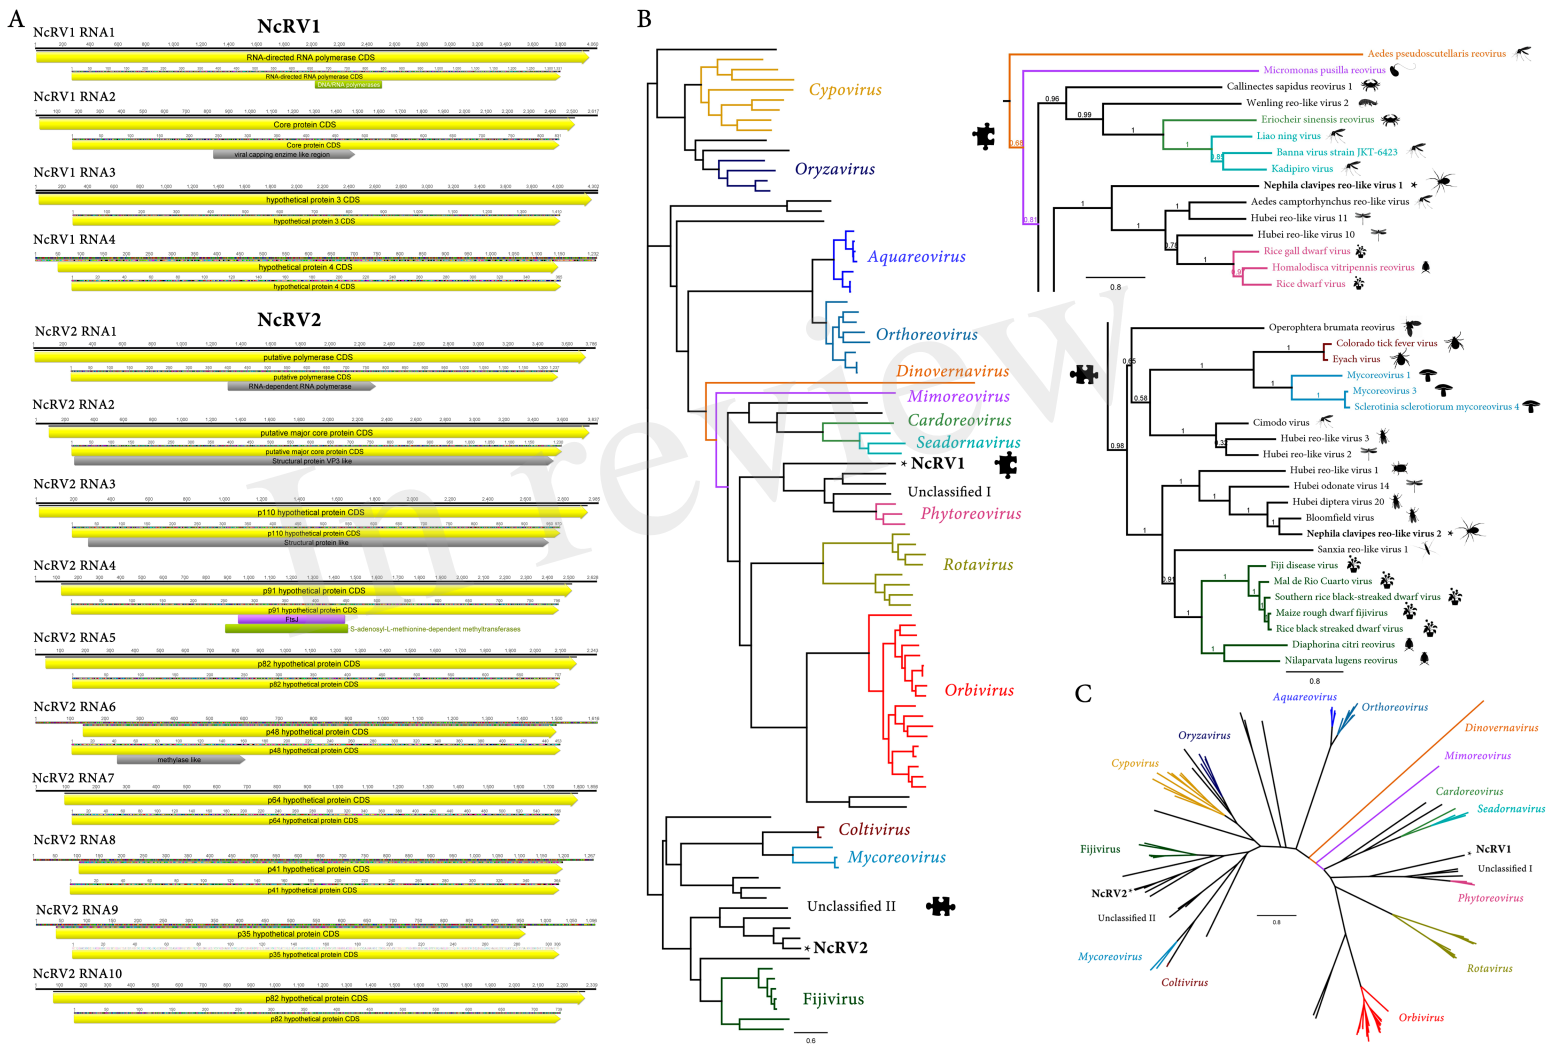

Figure 5.TIF

bioRxiv preprint doi: <https://doi.org/10.1101/140814>; this version posted October 13, 2017. The copyright holder for this preprint (which was not certified by peer review) is the author/funder, who has granted bioRxiv a license to display the preprint in perpetuity. It is made available under aCC-BY-NC-ND 4.0 International license.

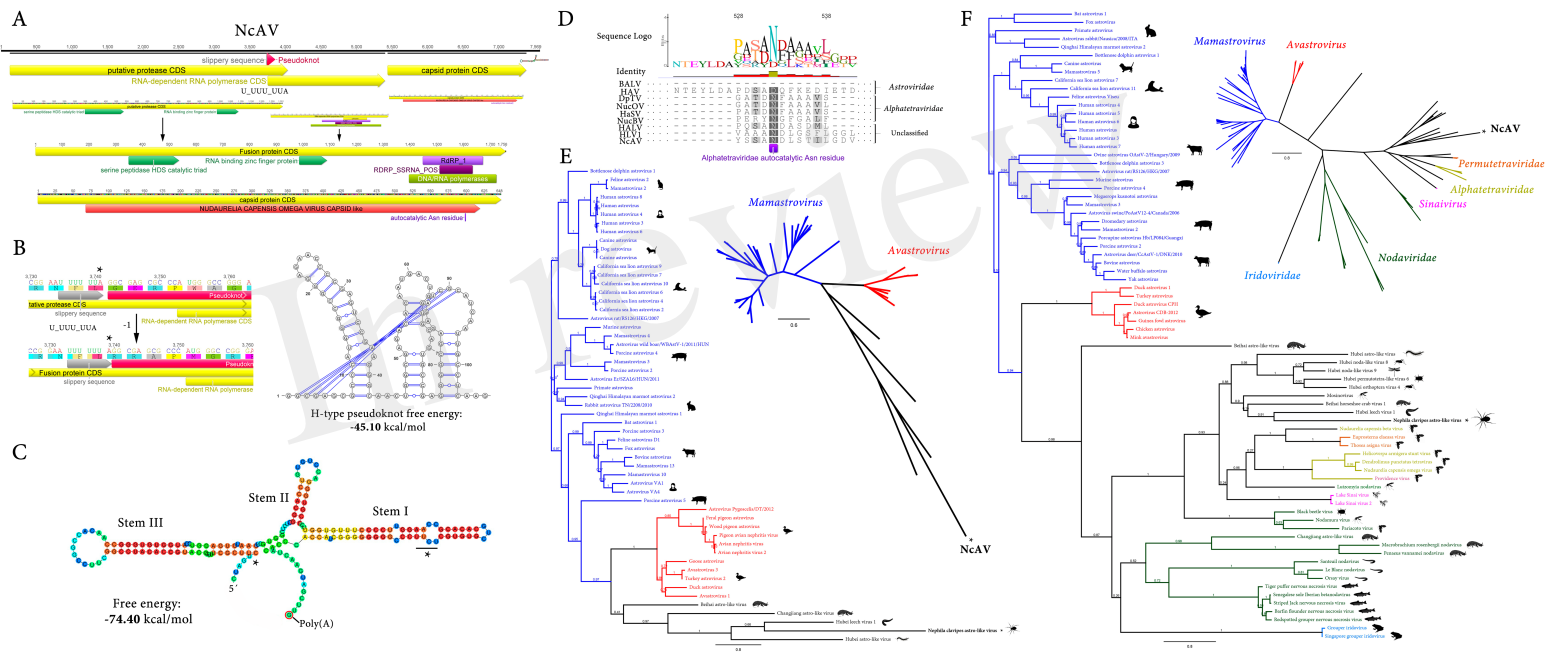

Figure 6.TIF

bioRxiv preprint doi: <https://doi.org/10.1101/140814>; this version posted October 13, 2017. The copyright holder for this preprint (which was not certified by peer review) is the author/funder, who has granted bioRxiv a license to display the preprint in perpetuity. It is made available under aCC-BY-NC-ND 4.0 International license.

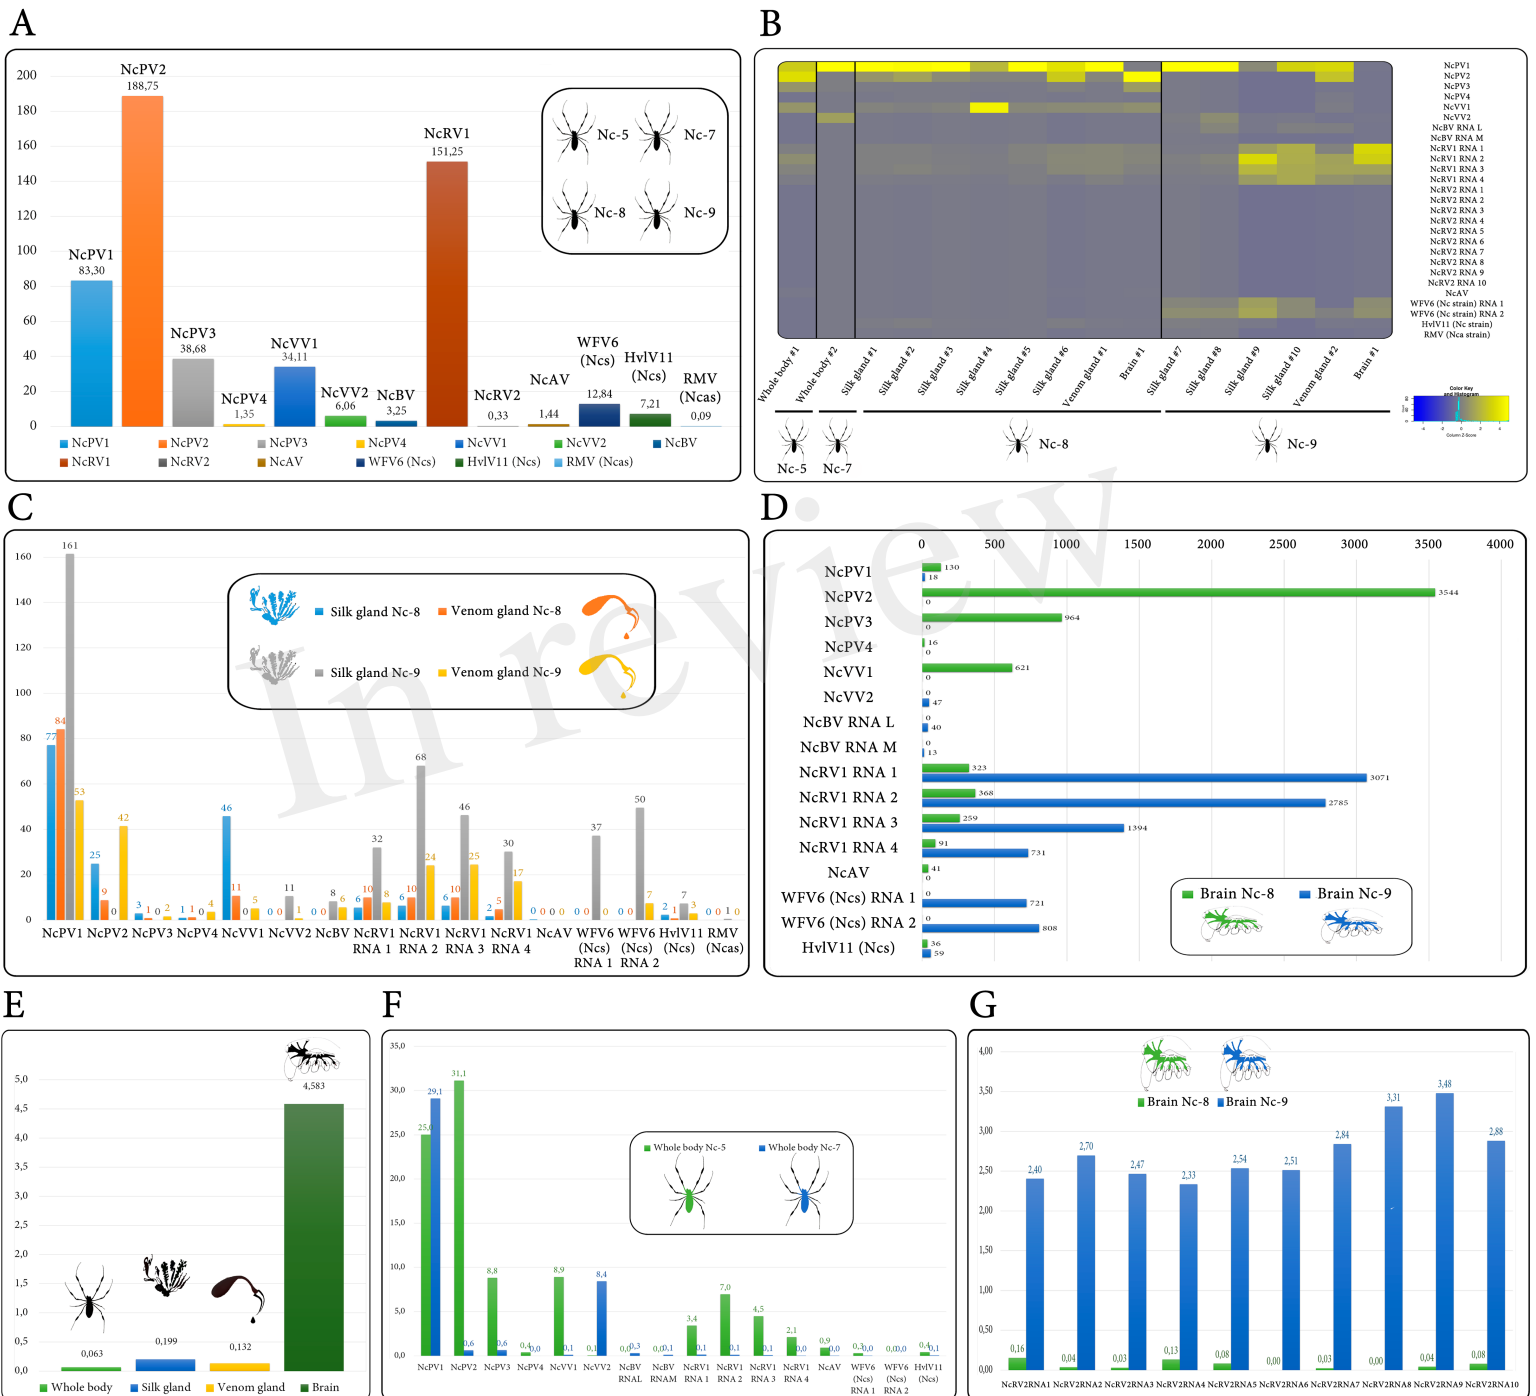

Source: https://www.biorxiv.org/content/10.1101/140814v2.full.pdf
